# Supplementary material for: A computational assessment of the electronic, thermoelectric, and defect properties of bournonite (CuPbSbS3) and related substitutions
Source: Royal Society of Chemistry journal article supplement (doi:10.1039/c7cp00437k), 2017-01-01
Supplement: c7cp00437k2.xlsx [file c7cp00437k2.xlsx]

## Sheet: stability-sorted
material_id	Formula	Space group symbol	DFT gap (eV)	E above hull (eV/atom)	n-ZT	c (n-ZT) (1/cm3)	T (n-ZT)	p-ZT	c (p-ZT)	T (p-ZT)	n-PF (uW/cmK2)	c (n-PF) (1/cm3)	T (n-PF) (K)	p-PF (maximum at optimum c and T)	c (p-PF)	T (p-PF)	mp-id	a	b	c	volume	direct?	metal? (based on DFT gap)	Decomposes to		Formula	n-mobility* (cm2/V.s)	n-sigma* (S/cm)	n-S* (uV/K)	n-PF* (uW/cmK2)	p-mobility* (cm2/V.s)	p-sigma* (S/cm)	p-S* (uV/K)	p-PF* (uW/cmK2)	m_e (electron effective mass)	m_h
m-496	CuAsPbS3	Pmn2_1	0.8814	0.00113891	1.84412	2.5e+20	1300	1.73214	5e+20	1300	38	5e+20	1300	26.9405	1e+21	1300	[u'mp-628643']	7.74827	8.17605	8.82995	559.38	FALSE	FALSE	['CuAsPbS3']		CuAsPbS3	57.51	932.17	-144.43	19.45	42.04	682.14	174.13	20.68	0.8846	1.0071
m-254	CuSbPbS3	Pmn2_1	0.6899	0.00154793	1.91426	1e+20	1300	1.93673	7.5e+20	1300	51	5e+20	1300	31.7857	1e+21	1200	[u'mp-649774']	7.88679	8.2546	8.8826	578.279	FALSE	FALSE	['CuSbS2', 'PbS']		CuSbPbS3	87.9	1422.66	-114.88	18.78	41.73	677.1	178.32	21.53	0.5069	1.0097
m-577	AgAsPbS3	Pmn2_1	1.1573	0.0103354	1.78305	1e+20	1300	1.57067	2.5e+20	1300	28.75	2.5e+20	1300	22.3941	7.5e+20	1300	[]	7.85412	8.67215	9.3639	637.795	FALSE	FALSE	['AgAsPbS3']		AgAsPbS3	93.59	1513.85	-126.15	24.09	25.06	406.59	183.96	13.76	0.7259	1.1923
m-498	CuAsPbSe3	Pmn2_1	0.4604	0.0103938	1.11422	2.5e+20	1300	1.16002	1e+21	1300	31.09	5e+20	1300	25.4208	1e+21	1300	[]	8.12262	8.55408	9.16547	636.832	FALSE	TRUE	['As2Se3', 'PbSe', 'Cu3AsSe4', 'CuAsSe']		CuAsPbSe3	105.83	1712.68	-126.4	27.36	74.1	1200.02	156.85	29.52	0.5564	0.7488
m-451	CuSnSbS3	Pmn2_1	0.603	0.0109301	1.42543	2.5e+20	1300	1.78049	5e+20	1200	49.65	5e+20	1300	37.9379	1e+21	1300	[]	7.72864	8.25168	8.79288	560.759	FALSE	FALSE	['CuSbS2', 'SnS']		CuSnSbS3	97.88	1584.75	-89.26	12.63	2.21	35.86	112.25	0.45	0.4272	0.5637
m-615	CuSnAsS3	Pmn2_1	0.7388	0.0135086	1.98599	1e+21	1300	2.14967	1e+21	1100	71.35	1e+22	1300	46.9888	1e+22	1300	[]	7.43751	8.22146	9.19248	562.095	FALSE	FALSE	['AsS', 'SnS', 'Cu2SnS3']		CuSnAsS3	89.05	1441.37	-112.44	18.22	5.95	96.52	113.18	1.24	0.4887	0.8707
m-459	CuSbPbSe3	Pmn2_1	0.3629	0.0157175	1.08511	2.5e+20	1300	1.1946	1e+21	1150	44.43	5e+20	1300	29.3248	1e+21	1150	[]	8.23477	8.62434	9.192	652.811	FALSE	TRUE	['CuSbSe2', 'PbSe']		CuSbPbSe3	194.2	3136.38	-67.99	14.5	67.6	1096.08	159.04	27.72	0.3272	0.7815
m-448	CuSnSbSe3	Pmn2_1	0.2016	0.0159897	0.612788	2.5e+20	1300	0.934027	1e+21	1100	35.71	7.5e+20	1300	30.3826	1e+21	1100	[]	8.07243	8.61925	9.22032	641.533	FALSE	FALSE	['Cu2SnSe3', 'SnSe', 'Sb2Se3', 'Cu']		CuSnSbSe3	229.94	3711.79	-69.97	18.17	69.12	1120.16	174.14	33.97	0.3129	0.7038
m-572	AgSnAsSe3	Pmn2_1	0.6623	0.0171291	p-cond at 1e20 T=600K (S/cm)	250	p-Seebeck (uV/K)	220	p-PF (uW/cmK2)	12.1		n-cond:	544.5	n-S	-182.2	n-PF	18.0757	7.7234	9.27904	10.1679	728.693	FALSE	FALSE	['Ag3AsSe3', 'As2Se3', 'SnSe']		AgSnAsSe3	138.84	2242.32	-112.21	28.23	77.98	1263.39	161.09	32.78	0.336	0.9312
m-489	CuSnAsSe3	Pmn2_1	0.2742	0.019983	0.698707	1e+20	850	0.892979	1e+21	1200	26.08	5e+20	1300	27.2593	1e+21	1250	[]	7.94656	8.55465	9.19485	625.066	FALSE	FALSE	['SnSe', 'As', 'As2Se3', 'Cu2SnSe3']		CuSnAsSe3	157.97	2552.75	-110.01	30.89	73.35	1187.81	167.02	33.13	0.4342	0.6662
m-631	AgSbPbS3	Pmn2_1	1.1055	0.022101	2.03453	1e+21	1300	2.25232	1e+21	1300	59.7	1e+21	1300	43.2723	1e+22	1300	[]	7.99601	8.83731	9.44	667.06	FALSE	FALSE	['AgSbS2', 'PbS']		AgSbPbS3	100.81	1630.26	-134.41	29.45	25.68	416.95	173.71	12.58	1.1713	1.1901
m-508	AgSnSbS3	Pmn2_1	1.0728	0.0239102	1.91983	7.5e+19	1300	1.70962	2.5e+20	1300	43.49	5e+20	1300	23.7503	5e+20	1300	[]	7.63539	8.96395	9.81217	671.577	FALSE	FALSE	['SnS', 'AgSbS2']		AgSnSbS3	82.63	1335.33	-102.12	13.93	30.54	495.57	164.95	13.48	0.4335	0.6979
m-570	AgSnAsS3	Pmn2_1	1.1175	0.0242888	1.82959	1e+20	1300	1.82044	2.5e+20	1300	35.48	5e+20	1300	25.0813	7.5e+20	1300	[]	7.41767	8.85026	9.75556	640.437	FALSE	TRUE	['AsS', 'SnS2', 'Ag']		AgSnAsS3	69.81	1129.87	-124.13	17.41	18.59	302.29	193.01	11.26	0.387	0.9119
m-482	CuBiPbS3	Pmn2_1	0.4054	0.0247913	0.918679	2.5e+20	1300	1.51858	1e+21	1100	40	7.5e+20	1300	33.9932	1e+21	1050	[]	7.97649	8.32557	8.8385	586.954	TRUE	FALSE	['CuBiS2', 'PbS']		CuBiPbS3	99.56	1607.28	-78.77	9.97	24.42	396.48	177.09	12.43	0.3186	1.0108
m-574	AgAsPbSe3	Pmn2_1	0.6314	0.0253278	1.29129	1e+20	1150	1.05673	5e+20	1300	29.14	2.5e+20	1300	21.4663	5e+20	1300	[]	8.14678	8.99966	9.73855	714.013	FALSE	FALSE	['PbSe', 'As2Se3', 'Ag3AsSe3']		AgAsPbSe3	42.35	683.8	-111.73	8.54	16.22	262.69	166.05	7.24	0.5191	0.8313
m-511	AgSbPbSe3	Pmn2_1	0.6209	0.0276833	1.26553	1e+20	1300	1.14542	5e+20	1300	31.61	2.5e+20	1300	23.6441	7.5e+20	1300	[]	8.28026	9.15938	9.81061	744.056	TRUE	FALSE	['PbSe', 'Ag2Se', 'Sb2Se3']		AgSbPbSe3	202.61	3270.81	-122.25	48.88	52.21	846.4	157.84	21.09	0.4872	0.8204
m-487	CuSnBiS3	Pmn2_1	0.2692	0.0284503	0.53209	2.5e+20	1300	1.19786	1e+21	1000	29.45	7.5e+20	1300	34.7419	1e+21	1000	[]	7.79554	8.30647	8.85696	573.519	FALSE	TRUE	['Cu2SnS3', 'Cu', 'Bi2S3', 'SnS']		CuSnBiS3	0	0	0	0	0	0	0	0	0	0
m-509	AgSnSbSe3	Pmn2_1	0.5446	0.0289149	1.06662	1e+20	1250	1.14169	5e+20	1250	31.24	2.5e+20	1300	26.3034	7.5e+20	1300	[]	8.06934	9.15199	9.9178	732.434	FALSE	FALSE	['Ag8SnSe6', 'Sb2Se3', 'SnSe', 'Ag']		AgSnSbSe3	80.59	1300.74	-93.51	11.37	26.68	432.35	169.03	12.35	0.3357	0.7879
m-465	CuGeSbSe3	Pmn2_1	0	0.0324454	0.301952	1e+22	1300	0.309985	1e+22	1200	49.25	1e+22	1300	29.708	1e+22	1300	[]	7.75037	8.59981	9.31538	620.886	FALSE	FALSE	['Sb2Se3', 'Sb', 'GeSe', 'Cu2GeSe3']		CuGeSbSe3	271.14	4375.61	-77.72	26.43	92.11	1491.44	173.27	44.78	0.2772	0.6308
m-518	AgGeSbSe3	Pmn2_1	0.4782	0.0341208	0.934513	1e+20	1200	0.867249	2.5e+20	1050	29.31	2.5e+20	1300	26.2133	5e+20	1250	[]	7.68869	9.25053	10.1349	720.841	TRUE	FALSE	['GeSe', 'Ag', 'Ag8GeSe6', 'Sb2Se3']		AgGeSbSe3	182.63	2945.48	-88	22.81	77.3	1250.68	162.39	32.98	0.3352	0.7054
m-463	CuGeSbS3	Pmn2_1	0.5379	0.0380196	1.10719	2.5e+20	1300	1.25174	2.5e+20	1050	41.1	7.5e+20	1300	28.6095	7.5e+20	1300	[]	7.33441	8.29686	9.08288	552.717	FALSE	TRUE	['Cu2GeS3', 'Sb', 'GeS2', 'Sb2S3']		CuGeSbS3	58.66	948.43	-88.12	7.36	6.48	105.22	199.3	4.18	0.4013	0.8312
m-522	AgGeSbS3	Pmn2_1	1.1036	0.0476937	1.79915	7.5e+19	1300	1.96812	2.5e+20	1300	35.01	2.5e+20	1300	27.8513	7.5e+20	1300	[]	7.3172	8.89734	9.82588	639.701	FALSE	FALSE	['Sb2S3', 'Sb', 'GeS2', 'Ag']		AgGeSbS3	50.1	809.63	-98.33	7.83	10.02	162.94	196.31	6.28	0.4275	0.8107
m-499	CuSnTe3As	Pmn2_1	0.0078	0.049104	0.351465	1e+21	600	0.578483	1e+22	1150	35.35	1e+22	1300	39.7053	1e+22	1250	[]	8.45296	9.11603	9.75274	751.522	FALSE	TRUE	['Te3As2', 'SnTe', 'Cu2SnTe3', 'As']		CuSnTe3As	110.74	1793.3	-149.81	40.25	220.92	3570.19	128.78	59.21	0.5576	0.4746
m-392	NaAsPbO3	Pmn2_1	1.3152	0.050693	1.60326	2.5e+20	1300	1.54712	1e+20	1300	53.09	1e+22	1200	67.33	2.5e+21	50	[]	7.42515	8.79305	6.6759	435.868	TRUE	FALSE	['Pb', 'As2Pb2O5', 'Na3AsO4']		NaAsPbO3	1280.91	20817.8	-262.91	1438.96	13.49	218.69	143.76	4.52	1.1345	1.0511
m-503	CuTe3AsPb	Pmn2_1	0.1845	0.0509097	0.63861	2.5e+20	900	0.666121	1e+21	1200	24.19	7.5e+20	1300	21.099	1e+21	1250	[]	8.59917	9.19094	9.82352	776.397	FALSE	FALSE	['CuTe', 'Te3As2', 'As', 'TePb']		CuTe3AsPb	58.33	946.67	-177.4	29.79	156.97	2537.63	127.63	41.34	0.5679	0.5078
m-486	CuSnBiSe3	Pmn2_1	0	0.05158	0.236973	1e+22	1300	0.63659	1e+22	850	41.19	1e+22	1300	44.5005	1e+22	950	[]	8.11878	8.63813	9.26372	649.674	FALSE	FALSE	['Cu2SnSe3', 'Bi2Se3', 'SnSe', 'Cu']		CuSnBiSe3	232.33	3751.32	-85.23	27.25	89.49	1449.96	159.43	36.85	0.3208	0.7432
m-456	CuSnSbTe3	Pmn2_1	0	0.0518339	0.521345	1e+22	1300	0.69924	1e+22	1050	68.43	1e+22	1300	52.2009	1e+22	1150	[]	8.59941	9.17683	9.75853	770.098	FALSE	FALSE	['Cu2SnTe3', 'Sn(SbTe2)2', 'SnTe', 'Cu']		CuSnSbTe3	176.29	2851.44	-82.68	19.49	202.23	3268.25	134.41	59.04	0.3049	0.4887
m-524	AgSnPSe3	Pmn2_1	0.7923	0.0520184	1.53839	1e+20	1200	1.49012	2.5e+20	1250	34.94	2.5e+20	1300	28.4744	7.5e+20	1300	[]	7.62046	9.16779	10.0701	703.524	FALSE	FALSE	['SnSe', 'SnPSe3', 'Ag8SnSe6', 'Ag3P11']		AgSnPSe3	100.44	1624.69	-113.06	20.77	21.81	353.36	169.05	10.1	0.4628	0.9104
m-506	CuGeAsSe3	Pmn2_1	0.0429	0.0525519	0.355766	5e+20	1300	0.248219	5e+20	900	22.83	5e+20	1300	15.9093	7.5e+20	1050	[]	7.50872	8.58618	9.40036	606.053	TRUE	FALSE	['As2Se3', 'As', 'Cu2GeSe3', 'GeSe2']		CuGeAsSe3	91.47	1476.5	-90.9	12.2	36.65	593.39	163.83	15.93	0.3755	0.58
m-468	CuPPbSe3	Pmn2_1	0.6411	0.0526297	1.55785	2.5e+20	1300	1.47463	5e+20	1250	32.53	5e+20	1300	26.6608	1e+21	1300	[]	8.03582	8.50524	9.10125	622.039	FALSE	FALSE	['CuP2', 'Cu3PSe4', 'PbSe', 'PPbSe3']		CuPPbSe3	82.09	1329.56	-153.47	31.32	82.2	1331.99	156.58	32.66	0.8617	0.7647
m-495	CuBiPbSe3	Pmn2_1	0.0908	0.0534433	0.432421	5e+20	1300	0.827109	1e+21	900	29.17	1e+21	1300	29.1322	1e+21	900	[]	8.27174	8.62172	9.18175	654.811	FALSE	FALSE	['Cu', 'Bi2Se3', 'PbSe', 'Cu3Se2']		CuBiPbSe3	165.55	2673.08	-78.95	16.66	46.58	755.03	164.99	20.55	0.2975	0.8454
m-575	AgSnTe3As	Pmn2_1	0.0664	0.0534791	0.39705	1e+21	650	0.283756	1e+22	1300	29.98	1e+22	1300	22.4789	1e+21	650	[]	8.43146	9.6873	10.3608	846.25	TRUE	FALSE	['Te3As2', 'Ag2Te', 'SnTe']		AgSnTe3As	100.26	1627.32	-137.76	30.88	181.87	2942.33	134.74	53.42	0.4907	0.5535
m-579	AgGeAsSe3	Pmn2_1	0.403	0.0535611	0.841001	2.5e+20	1300	0.71537	2.5e+20	950	34.93	2.5e+20	1300	26.8601	5e+20	1200	[]	7.46086	9.16922	10.1202	692.327	FALSE	FALSE	['Ag8GeSe6', 'As', 'As2Se3', 'GeSe2']		AgGeAsSe3	56.65	914.25	-96.8	8.57	26.03	421.35	150.67	9.57	0.3597	0.8418
m-488	CuGeBiS3	Pmn2_1	0.1584	0.0539602	0.426722	2.5e+20	1300	0.520536	1e+21	1050	23.84	1e+21	1300	21.8896	1e+21	1100	[]	7.53453	8.21032	8.86745	548.548	FALSE	FALSE	['Ge', 'Cu2GeS3', 'Bi2S3']		CuGeBiS3	71.1	1149.03	-108	13.4	31.1	504.62	186.48	17.55	0.4385	0.9307
m-464	CuSbTe3Pb	Pmn2_1	0.1408	0.0553369	0.932094	7.5e+20	1250	0.838845	1e+21	1050	49.76	1e+21	1300	29.9221	1e+21	1150	[]	8.6951	9.1505	9.72021	773.384	FALSE	FALSE	['CuTe', 'Cu', 'TePb', 'Sb2Te3']		CuSbTe3Pb	104.06	1686.26	-112.77	21.44	165.77	2681.49	133.31	47.65	0.374	0.5212
m-610	CuSnPS3	Pmn2_1	0.9071	0.0554115	2.88965	1e+21	1300	2.4498	1e+21	1250	83.09	1e+22	1300	40.7787	1e+22	1300	[]	7.30529	8.14087	9.14182	543.677	FALSE	TRUE	['CuP2', 'SnS', 'SnPS3', 'Cu3PS4']		CuSnPS3	34.81	565.16	-159.71	14.42	35.27	572.32	160.68	14.78	0.8589	0.8955
m-608	CuSnPSe3	Pmn2_1	0.5381	0.0576364	1.60321	1e+21	1100	1.51071	1e+21	1000	53.59	1e+22	1300	43.3532	1e+22	1300	[]	7.6772	8.54541	9.43055	618.689	FALSE	FALSE	['SnPSe3', 'Cu2P7', 'Cu2SnSe3']		CuSnPSe3	109.77	1775.63	-107.3	20.44	65.64	1063.42	193.06	39.64	0.3515	0.7196
m-513	AgSnSbTe3	Pmn2_1	0.1157	0.0580876	0.408036	1e+21	1000	0.414861	1e+21	700	41.55	1e+22	1300	26.3663	1e+21	750	[]	8.59411	9.73482	10.3871	869.005	FALSE	FALSE	['Ag2Te', 'Sn(SbTe2)2', 'SnTe']		AgSnSbTe3	164.96	2666.88	-103.07	28.33	181.37	2929.93	131.7	50.82	0.3425	0.5327
m-582	AgTe3AsPb	Pmn2_1	0.17	0.0581948	0.617034	1e+21	750	0.453113	1e+22	1300	31.7	1e+22	1300	25.4283	1e+21	750	[]	8.69287	9.56753	10.1309	842.582	FALSE	FALSE	['Te3As2', 'Ag2Te', 'TePb']		AgTe3AsPb	171.53	2771.6	-112.31	34.96	111.36	1800.36	125.47	28.34	0.4478	0.5645
m-611	CuPPbS3	Pmn2_1	0.9993	0.058428	2.71131	1e+21	1300	2.20213	1e+21	1200	59.17	1e+22	1300	43.9873	1e+22	1300	[]	7.58829	8.11623	8.96256	551.989	FALSE	FALSE	['PbS', 'Cu3PS4', 'PPbS3', 'CuP2']		CuPPbS3	12.6	204.31	-169.73	5.89	11.56	187.77	175.4	5.78	1.8692	0.9476
m-580	AgGeTe3As	Pmn2_1	0	0.06228	0.0854627	1e+22	1300	0.0654436	1e+21	300	23.24	1e+22	1300	11.0963	1e+21	400	[]	8.06507	9.74473	10.558	829.776	FALSE	FALSE	['Te3As2', 'Ag2Te', 'GeTe']		AgGeTe3As	0	0	0	0	144.64	2334.57	134.07	41.96	0	0.3617
m-461	CuGeSbTe3	Pmn2_1	0	0.0625296	0.320111	1e+21	1300	0.175398	2.5e+21	1300	23.59	1e+21	1300	10.0849	2.5e+21	1300	[]	8.29448	9.18101	9.90237	754.082	FALSE	FALSE	['Sb2Te3', 'Cu2GeTe3', 'Ge']		CuGeSbTe3	104.93	1696.53	-114.25	22.14	126.16	2039.07	139.69	39.79	0.1463	0.1164
m-521	AgSbTe3Pb	Pmn2_1	0.1933	0.0626102	0.613151	1e+21	950	0.651148	1e+22	1300	43.89	1e+22	1300	34.3594	1e+22	1300	[]	8.847	9.65641	10.1196	864.52	FALSE	FALSE	['TePb', 'Ag2Te', 'Sb2Te3']		AgSbTe3Pb	223.4	3605.21	-87.2	27.41	112.37	1818.53	123.85	27.89	0.3524	0.5741
m-563	AgBiPbS3	Pmn2_1	0.7643	0.06267	1.34774	7.5e+19	1300	1.52589	5e+20	1300	29.21	2.5e+20	1300	26.7134	1e+21	1300	[]	8.12319	8.79388	9.31577	665.465	FALSE	FALSE	['PbS', 'AgBi3S5', 'Ag2S']		AgBiPbS3	42.02	679.2	-130.58	11.58	0.33	5.41	139.72	0.11	0.9135	0.956
m-319	NaSbPbO3	Pmn2_1	1.1218	0.063513	1.63498	1e+20	1300	1.42278	7.5e+19	1300	29.64	7.5e+20	1300	22.8295	2.5e+20	1300	[]	7.36139	8.94273	6.99731	460.639	FALSE	FALSE	['Na3SbO4', 'Na2Sb4O7', 'PbO', 'Pb']		NaSbPbO3	35.98	584.15	-341.83	68.26	16.1	260.72	126.67	4.18	2.864	0.715
m-510	CuGeTe3As	Pmn2_1	0	0.0645307	0.159134	1e+21	1200	0.100982	2.5e+21	1300	14.72	1e+21	1200	10.5274	1e+22	1300	[]	8.08957	9.19334	9.95627	740.45	FALSE	FALSE	['As', 'GeTe', 'Te3As2', 'Cu2GeTe3']		CuGeTe3As	42.03	681.42	-166.26	18.84	77.98	1260.57	132.97	22.29	0.0843	0.1046
m-555	AgSnBiS3	Pmn2_1	0.7242	0.0646326	1.2451	7.5e+19	1300	1.61164	5e+20	1300	27.93	2.5e+20	1300	25.3375	7.5e+20	1250	[]	7.87557	8.86875	9.51506	664.593	FALSE	FALSE	['SnS2', 'AgBi3S5', 'Ag', 'SnS']		AgSnBiS3	0	0	0	0	0	0	0	0	0	0
m-491	CuGeBiSe3	Pmn2_1	0	0.064654	0.188936	1e+21	1300	0.181121	2.5e+21	1000	17.26	1e+21	1300	9.9021	2.5e+21	1150	[]	7.90315	8.60919	9.26547	630.419	TRUE	FALSE	['Cu2GeSe3', 'Ge', 'Bi2Se3']		CuGeBiSe3	68.97	1114.45	-103.18	11.86	12.87	208.5	178.11	6.61	0.1976	0.2969
m-519	AgGeSbTe3	Pmn2_1	0	0.0658596	0.19601	1e+22	1300	0.127275	1e+21	450	31.68	1e+22	1300	15.9028	1e+21	550	[]	8.32027	9.78919	10.4851	854.001	FALSE	FALSE	['GeTe', 'Ag2Te', 'Sb2Te3']		AgGeSbTe3	137.9	2227.56	-85.69	16.36	156.21	2522.3	126.36	40.27	0.3721	0.4819
m-514	CuGeAsS3	Pmn2_1	0.6424	0.0675034	1.27378	1e+20	1200	1.34706	2.5e+20	1150	39.35	5e+20	1300	28.9398	7.5e+20	1300	[]	7.09792	8.23124	9.06012	529.335	FALSE	FALSE	['AsS', 'As', 'Cu2GeS3', 'GeS2']		CuGeAsS3	51.87	838.19	-95.93	7.71	6	97.39	189.88	3.51	0.4522	0.7851
m-623	NaSbPbSe3	Pmn2_1	1.1468	0.0681264	3.59505	1e+21	1300	2.72471	1e+21	1250	71.26	1e+21	1300	52.5541	1e+22	1300	[]	9.41724	11.1959	7.40777	781.036	FALSE	FALSE	['NaSbSe2', 'PbSe']		NaSbPbSe3	40.49	656.45	-103.24	7	6.67	108.59	169.1	3.11	0.3957	0.6124
m-530	AgPPbSe3	Pmn2_1	0.7756	0.0681799	1.48484	1e+20	1250	1.29424	5e+20	1300	26.86	2.5e+20	1300	21.0663	7.5e+20	1300	[]	8.09145	8.92392	9.64585	696.502	FALSE	TRUE	['Ag7PSe6', 'PPbSe3', 'PbSe', 'Ag3P11']		AgPPbSe3	146.39	2365.96	-110.95	29.12	24.93	403.84	178.4	12.85	0.5062	0.8411
m-559	AgSnBiSe3	Pmn2_1	0.2888	0.0689499	0.578257	1e+20	1100	0.667614	1e+21	1250	21.09	2.5e+20	1300	20.6703	7.5e+20	1200	[]	8.19751	9.1984	9.85494	743.102	FALSE	TRUE	['Ag', 'SnSe', 'Ag8SnSe6', 'Bi2Se3']		AgSnBiSe3	98.85	1595.57	-100.79	16.21	26.18	424.43	161.14	11.02	0.3435	0.8179
m-581	AgGeAsS3	Pmn2_1	1.1641	0.0705834	1.93767	1e+20	1300	2.06336	2.5e+20	1300	41.94	5e+20	1300	31.3707	7.5e+20	1300	[]	7.05242	8.8533	9.84281	614.557	FALSE	TRUE	['As', 'AsS', 'Ag2GeS3', 'GeS2']		AgGeAsS3	38.3	618.51	-104.63	6.77	1.82	29.57	130.65	0.5	0.3466	0.8018
m-568	AgBiPbSe3	Pmn2_1	0.3424	0.0723283	0.689022	1e+20	1100	0.904703	1e+21	1300	23.15	2.5e+20	1300	24.0089	1e+21	1300	[]	8.42406	9.07426	9.61238	734.791	FALSE	FALSE	['Ag2Se', 'PbSe', 'Bi2Se3']		AgBiPbSe3	96.14	1551.26	-103.99	16.78	15.65	254.14	169.02	7.26	0.7155	0.9235
m-562	AgGeBiSe3	Pmn2_1	0.2144	0.0726481	0.510676	2.5e+20	1300	0.489639	2.5e+20	800	20.66	2.5e+20	1300	19.8526	5e+20	1050	[]	7.86198	9.27085	10.003	729.095	FALSE	FALSE	['Ag8GeSe6', 'Ag', 'GeSe', 'Bi2Se3']		AgGeBiSe3	77.73	1254.69	-107.95	14.62	23.12	374.93	170.92	10.95	0.5735	0.766
m-564	AgGeBiS3	Pmn2_1	0.7555	0.0768277	1.33209	1e+20	1300	1.54506	5e+20	1300	28.36	2.5e+20	1300	23.9664	7.5e+20	1200	[]	7.5182	8.93717	9.65867	648.981	FALSE	FALSE	['Bi2S3', 'GeS2', 'Ag', 'GeS']		AgGeBiS3	53.44	863.86	-121.51	12.75	2.15	34.97	126.39	0.56	0.3815	0.9436
m-616	AgSnBiTe3	Pmn2_1	0.0642	0.0769953	0.341608	1e+21	750	0.731048	1e+22	1200	30.69	1e+22	1300	58.437	1e+22	1200	[]	8.78283	10.4054	9.3785	857.092	FALSE	FALSE	['Ag2Te', 'Sn(BiTe2)2', 'SnTe']		AgSnBiTe3	0	0	0	0	0	0	0	0	0	0
m-500	CuSnBiTe3	Pmn2_1	0	0.0776665	0.265429	1e+21	1250	0.35246	1e+21	750	23.11	1e+21	1300	21.0839	1e+21	800	[]	8.63688	9.15726	9.68474	765.967	FALSE	FALSE	['Sn(BiTe2)2', 'Cu2SnTe3', 'SnTe', 'Cu']		CuSnBiTe3	0	0	0	0	0	0	0	0	0	0
m-436	KBiPbS3	Pmn2_1	1.3794	0.0779597	N/A	N/A	N/A	N/A	N/A	N/A	N/A	N/A	N/A	0.0138	N/A	N/A	[]	8.08592	11.1944	10.2464	927.468	FALSE	FALSE	['Bi2S3', 'K2S', 'PbS']		KBiPbS3	10.92	177.71	-203.1	7.33	9.42	153.22	185.97	5.3	3.5985	0.9547
m-523	AgSnPS3	Pmn2_1	1.2103	0.0808029	1.85282	1e+20	1300	1.64118	2.5e+20	1300	31.21	5e+20	1300	21.4239	5e+20	1300	[]	7.22722	8.80424	9.74246	619.915	FALSE	FALSE	['Ag', 'SnPS3']		AgSnPS3	39.18	635.51	-143.2	13.03	17.22	279.82	171.51	8.23	0.618	1.142
m-599	NaSnSbTe3	Pmn2_1	0.3605	0.0812564	1.77668	1e+21	850	0.917924	1e+21	750	79.54	1e+22	1300	55.3385	1e+22	1300	[]	9.17554	11.9072	8.14637	890.034	TRUE	FALSE	['SnTe', 'Sn(SbTe2)2', 'Na2Te']		NaSnSbTe3	0.12	1.98	-124.27	0.03	12.97	210.68	176.64	6.57	0.7079	0.6133
m-310	NaSnSbSe3	Pmn2_1	0.9662	0.0818424	1.76737	1e+21	1300	2.06888	1e+21	1250	59.75	1e+21	1300	33.1697	1e+22	1300	[]	7.96988	9.95862	10.5291	835.682	FALSE	TRUE	['SnSe', 'NaSbSe2']		NaSnSbSe3	150.55	2428.45	-106.72	27.66	14.51	235.82	183.65	7.95	0.4872	1.3938
m-501	CuBiTe3Pb	Pmn2_1	0	0.0827768	0.365401	1e+21	1250	0.431749	1e+21	750	29.77	1e+21	1300	23.1743	1e+21	850	[]	8.74822	9.171	9.73696	781.195	FALSE	TRUE	['Bi2Te3', 'TePb', 'CuTe', 'Cu']		CuBiTe3Pb	78.91	1275.88	-129.45	21.38	56.65	918.05	135.43	16.84	0.4026	0.4399
m-375	NaBiPbO3	Pmn2_1	1.0964	0.0842596	1.3004	5e+19	1300	1.83822	1e+20	1300	36.59	1e+21	1300	37.7633	7.5e+20	1300	[]	7.256	8.94612	7.26191	471.392	FALSE	FALSE	['NaBiO2', 'PbO']		NaBiPbO3	23.75	384.08	-118.72	5.41	10.28	166.99	153.37	3.93	0.4577	1.0916
m-477	CuGePS3	Pmn2_1	0.9875	0.0844049	2.035	1e+20	1300	1.97761	2.5e+20	1300	52.97	7.5e+20	1300	31.0617	7.5e+20	1300	[]	6.92824	8.13494	8.97901	506.064	TRUE	FALSE	['Cu2P7', 'GeS2', 'Cu2GeS3', 'Cu3PS4']		CuGePS3	20.07	325.33	-138.09	6.2	2.18	35.46	123.81	0.54	0.5801	1.0222
m-536	AgGePS3	Pmn2_1	1.3117	0.0858567	1.93898	1e+20	1300	2.22658	2.5e+20	1300	40.55	5e+20	1300	32.1445	7.5e+20	1300	[]	6.85504	8.78675	9.8263	591.873	FALSE	FALSE	['GeS2', 'Ag3PS4', 'Ag', 'Ag3P11']		AgGePS3	49.11	795.28	-128.88	13.21	12.9	209.97	205.56	8.87	0.4943	0.9872
m-535	AgGePSe3	Pmn2_1	0.6772	0.0868693	1.40913	1e+20	1100	1.09633	2.5e+20	1200	44.34	5e+20	1300	30.5716	5e+20	1300	[]	7.28499	9.15405	10.1293	675.492	FALSE	TRUE	['Ag8GeSe6', 'GeSe2', 'PSe', 'Ag3P11']		AgGePSe3	126.91	2052.02	-117.29	28.23	90.58	1465.87	143.38	30.14	0.5147	0.9232
m-371	NaSnAsSe3	Pmn2_1	0.9961	0.0878462	N/A	N/A	N/A	N/A	N/A	N/A	N/A	N/A	N/A	0.01	N/A	N/A	[]	7.69752	9.84195	10.6669	808.106	FALSE	FALSE	['NaAsSe2', 'SnSe']		NaSnAsSe3	139.8	2255.83	-107.44	26.04	8.57	139.36	201.7	5.67	0.5186	1.7325
m-401	KSbPbO3	Pmn2_1	1.0021	0.0884776	1.42633	1e+20	1300	1.29576	1e+20	1300	31.18	5e+20	1300	21.5414	2.5e+20	1300	[]	7.23244	9.94992	7.23405	520.578	FALSE	FALSE	['PbO', 'KSbO2']		KSbPbO3	32.14	521.34	-179.51	16.8	51.58	835.02	131.15	14.36	0.7798	0.7748
m-576	AgBiTe3Pb	Pmn2_1	0.0007	0.0892565	0.266515	1e+21	800	0.600762	1e+22	1150	30.19	1e+22	1300	40.0672	1e+22	1300	[]	8.95108	9.6022	9.98581	858.281	FALSE	FALSE	['Bi2Te3', 'Ag2Te', 'TePb']		AgBiTe3Pb	0	0	0	0	108.36	1754.54	128.01	28.75	0	0.5486
m-372	NaSnAsS3	Pmn2_1	1.2789	0.0894389	1.88373	7.5e+19	1300	1.48094	2.5e+20	1300	36.76	2.5e+20	1300	19.0395	5e+20	1300	[]	7.36789	9.48822	10.1786	711.564	FALSE	FALSE	['NaAsS2', 'SnS']		NaSnAsS3	23.46	378.73	-92.6	3.25	1.89	30.67	191.5	1.12	0.4405	1.887
m-545	CuGeBiTe3	Pmn2_1	0	0.0895186	0.165293	2.5e+21	1300	0.167851	2.5e+21	1100	15.23	2.5e+21	1300	11.0679	2.5e+21	1150	[]	8.42902	9.18267	9.61967	744.571	FALSE	FALSE	['Bi2Te3', 'Cu2GeTe3', 'Ge']		CuGeBiTe3	74.88	1213.07	-154.25	28.86	84.45	1367.1	133.96	24.53	0.0715	0.1813
m-376	NaAsPbS3	Pmn2_1	1.4192	0.0902747	1.66503	1e+20	1300	1.62628	2.5e+20	1300	30.47	5e+20	1300	23.1218	5e+20	1300	[]	7.80661	9.76367	9.26333	706.062	FALSE	TRUE	['PbS', 'NaAsS2']		NaAsPbS3	1.21	19.66	-156.13	0.48	9.09	148.04	220	7.17	0.867	1.4295
m-460	KAsPbO3	Pmn2_1	1.0013	0.0914801	1.42234	1e+20	1300	1.35695	1e+20	1300	40.49	7.5e+21	1000	21.1103	7.5e+20	50	[]	7.08145	9.63928	7.16803	489.291	FALSE	FALSE	['KAsO2', 'PbO']		KAsPbO3	14.68	238.42	-177.28	7.49	16.65	269.89	160.55	6.96	1.3778	1.0232
m-565	AgGeBiTe3	Pmn2_1	0	0.0915535	0.140445	1e+22	1300	0.090485	1e+16	1300	19.56	1e+22	1300	11.7778	1e+21	400	[]	8.50259	9.73346	10.2659	849.602	FALSE	FALSE	['Ag2Te', 'GeTe', 'Bi2Te3']		AgGeBiTe3	11.96	193.04	-71.05	0.97	5.45	88.2	137.72	1.67	0.2776	0.5424
m-316	NaGeSbSe3	Pmn2_1	0.9784	0.0922217	1.7903	1e+21	1300	2.59129	1e+21	1150	65.6	1e+21	1300	55.0217	1e+22	1300	[]	7.68344	9.82757	10.6003	800.424	FALSE	FALSE	['Sb', 'Sb2Se3', 'GeSe', 'Na4Ge2Se5']		NaGeSbSe3	163.58	2637.96	-105.53	29.38	13.49	219.51	200.36	8.81	0.5749	1.7212
m-597	CuGePSe3	Pmn2_1	0.3674	0.0923905	1.25494	1e+21	1000	0.836224	1e+21	850	65.67	1e+21	1100	35.0122	1e+22	1300	[]	7.33443	8.57732	9.48634	596.783	FALSE	FALSE	['PSe', 'Cu2P7', 'Cu2GeSe3', 'GeSe2']		CuGePSe3	0	0	0	0	0	0	0	0	0	0
m-443	KBiPbSe3	Pmn2_1	0.7605	0.097446	1.81809	1e+21	1300	2.43858	1e+21	1050	76.29	1e+22	1300	56.6006	1e+22	1300	[]	8.8417	12.4259	7.90628	868.634	FALSE	FALSE	['K3BiSe3', 'K2Bi8Se13', 'PbSe']		KBiPbSe3	78.23	1264.93	-84.45	9.02	26.31	426.89	176.73	13.33	0.3865	0.5165
m-394	KSbTe3Pb	Pmn2_1	0.7505	0.0976719	2.38133	1e+21	1300	1.63166	1e+21	900	64.66	1e+21	1300	38.9356	1e+22	1300	[]	9.19791	12.936	8.60936	1024.38	FALSE	FALSE	['TePb', 'Sb2Te3', 'K3SbTe3']		KSbTe3Pb	52.92	858.16	-147.03	18.55	11.75	190.97	177.63	6.03	0.5034	1.0024
m-308	NaSnSbS3	Pmn2_1	1.244	0.100956	1.86499	7.5e+19	1300	1.45932	2.5e+20	1300	37.43	2.5e+20	1300	19.7925	5e+20	1300	[]	7.64223	9.66291	10.2007	753.285	FALSE	FALSE	['NaSbS2', 'SnS']		NaSnSbS3	99.05	1597.65	-87.39	12.2	7.55	122.79	183.12	4.12	0.4196	1.4992
m-378	NaAsPbSe3	Pmn2_1	1.1798	0.101745	2.17367	1e+21	1300	2.65812	1e+21	1250	57.3	1e+21	1300	44.8968	1e+22	1250	[]	8.05116	9.99228	9.93012	798.873	FALSE	FALSE	['NaAsSe2', 'PbSe']		NaAsPbSe3	1.29	20.9	-150.29	0.47	13.64	222.03	220.43	10.79	0.9039	1.4287
m-593	KTe3AsPb	Pmn2_1	0.8491	0.102324	2.48608	1e+21	1250	1.3451	1e+21	950	45.14	1e+21	1200	23.8552	1e+22	1300	[]	9.86175	12.7293	8.13283	1020.94	FALSE	TRUE	['K2Te3', 'Te3As2', 'TePb', 'As']		KTe3AsPb	0	0	0	0	0	0	0	0	0	0
m-532	AgPPbS3	Pmn2_1	1.3679	0.103847	1.8018	1e+20	1300	1.91069	5e+20	1300	29.74	5e+20	1300	22.7413	7.5e+20	1250	[]	7.49278	8.80505	9.55942	630.676	FALSE	TRUE	['Ag', 'PPbS3']		AgPPbS3	16.93	274.19	-152.44	6.37	7.27	118.22	177.57	3.73	0.6461	1.3734
m-528	AgSnTe3P	Pmn2_1	0.1481	0.104015	0.653112	1e+21	650	0.382654	1e+21	650	40.04	1e+21	700	26.4367	1e+21	700	[]	8.29109	9.62203	10.3662	826.986	FALSE	FALSE	['Te', 'SnTe', 'Ag3P11', 'Ag2Te']		AgSnTe3P	0	0	0	0	0	0	0	0	0.4727	0.5678
m-445	KBiTe3Pb	Pmn2_1	0.4267	0.104552	0.81409	1e+21	1200	1.60937	1e+21	650	59.56	1e+22	1300	55.308	1e+22	1150	[]	9.1343	13.302	8.45056	1026.78	FALSE	TRUE	['Bi2Te3', 'K3BiTe3', 'TePb']		KBiTe3Pb	0	0	0	0	0	0	0	0	0.2777	1.0693
m-314	NaSbPbS3	Pmn2_1	1.4139	0.106216	1.83352	7.5e+19	1300	1.40421	1e+20	1300	36.29	2.5e+20	1300	56.4073	2.5e+21	50	[]	7.95541	9.80472	9.66548	753.913	FALSE	FALSE	['PbS', 'NaSbS2']		NaSbPbS3	40.45	656.32	-111.02	8.09	36.63	594.2	169.45	17.06	0.4608	0.8897
m-544	AgTe3PPb	Pmn2_1	0.2719	0.106464	0.927249	1e+21	850	0.61432	1e+21	800	38.95	1e+21	850	27.2444	1e+21	850	[]	8.62823	9.47912	10.0371	820.915	TRUE	FALSE	['Ag3P11', 'TePb', 'Te', 'Ag2Te']		AgTe3PPb	0	0	0	0	0	0	0	0	0.4368	0.5733
m-320	NaGeSbS3	Pmn2_1	1.3307	0.106683	1.90271	7.5e+19	1300	1.43982	2.5e+20	1300	36.44	2.5e+20	1300	18.4889	7.5e+20	1300	[]	7.31628	9.41764	10.2594	706.897	FALSE	FALSE	['Sb', 'NaSbS2', 'Na2Ge2S5', 'GeS2']		NaGeSbS3	101.64	1639.02	-89.5	13.13	4.89	79.63	193.82	2.99	0.3835	1.9775
m-453	KAsPbS3	Pmn2_1	1.58	0.107713	2.22864	1e+21	1300	2.08687	1e+21	1300	64.11	1e+21	1300	27.6563	1e+22	1300	[]	7.64822	10.66	10.3606	844.698	TRUE	FALSE	['AsS', 'K3AsS4', 'PbS']		KAsPbS3	0.78	12.72	-171.46	0.37	2.25	36.68	145.24	0.77	1.1489	1.4665
m-534	AgGeTe3P	Pmn2_1	0	0.112702	0.178363	1e+21	450	0.0987797	1e+21	350	34.15	1e+22	1300	13.2039	1e+21	450	[]	7.94293	9.66792	10.5436	809.657	TRUE	FALSE	['GeTe', 'Ag3P11', 'Ag2Te', 'Te']		AgGeTe3P	9.24	149.54	-97.16	1.41	268.92	4341.48	114.29	56.71	0.8679	0.6591
m-442	KBiPbO3	Pmn2_1	0.828	0.113026	1.19943	1e+20	1300	1.55918	2.5e+20	1300	29.97	5e+20	1300	34.4526	5e+20	1300	[]	7.28433	10.0761	7.29513	535.445	FALSE	FALSE	['PbO', 'KBiO2']		KBiPbO3	28.05	454.57	-162.42	11.99	19.85	322.18	157.75	8.02	0.9995	1.5073
m-385	NaTe3AsPb	Pmn2_1	0.7017	0.11372	1.97673	1e+21	1100	1.91332	1e+21	950	53.11	1e+21	1100	51.5114	1e+22	1300	[]	8.69969	11.2476	9.6727	946.483	TRUE	FALSE	['Na2Te', 'NaTe3', 'As', 'TePb']		NaTe3AsPb	20.73	336.62	-168.36	9.54	6.79	110.29	196.89	4.28	0.764	1.1672
m-381	NaGeAsSe3	Pmn2_1	0.8078	0.115189	1.41024	1e+20	1300	1.42842	2.5e+20	1200	40.71	2.5e+20	1300	35.7057	5e+20	1300	[]	7.44567	9.73414	10.7087	776.137	FALSE	FALSE	['Na2Ge2Se5', 'As', 'As2Se3']		NaGeAsSe3	121.31	1955.98	-95.9	17.99	12.19	197.38	152.22	4.57	0.6139	3.0054
m-318	NaSbTe3Pb	Pmn2_1	0.7199	0.115656	1.66163	1e+21	1300	1.56513	1e+21	1050	51.45	1e+21	1300	37.7065	1e+22	1300	[]	8.76995	10.7886	10.423	986.177	FALSE	FALSE	['Sb2Te3', 'Na2Te', 'TePb']		NaSbTe3Pb	27.69	450.34	-198.22	17.69	28.5	462.93	186.84	16.16	2.1388	0.6291
m-472	CuTe3PPb	Pmn2_1	0.3514	0.116165	1.12568	2.5e+20	950	0.854966	1e+21	1300	32.11	7.5e+20	1300	22.8985	1e+21	1300	[]	8.52018	9.11692	9.70054	753.516	FALSE	FALSE	['CuP2', 'CuTe', 'Te', 'TePb']		CuTe3PPb	112.83	1828.98	-91.86	15.43	198.62	3212.31	127.63	52.33	0.3294	0.5122
m-462	CuSnTe3P	Pmn2_1	0.1787	0.11696	0.686542	2.5e+20	850	0.705513	1e+21	1250	30.49	7.5e+20	1300	25.0595	1e+21	1250	[]	8.41086	9.0203	9.62776	730.443	FALSE	FALSE	['SnTe', 'Cu2SnTe3', 'Te', 'CuP2']		CuSnTe3P	2.4	38.82	-94.7	0.35	18.54	299.64	130.9	5.13	0.3809	0.4742
m-417	KPPbSe3	Pmn2_1	1.5503	0.117203	3.70358	1e+21	1300	1.56898	1e+21	1300	59.71	1e+22	1300	19.0339	1e+21	550	[]	9.57192	11.7567	7.48626	842.463	FALSE	FALSE	['K2PSe3', 'PbSe', 'PPbSe3', 'P']		KPPbSe3	9.5	154.58	-182.69	5.16	8.81	143.11	196.39	5.52	0.9301	1.654
m-368	NaSnTe3As	Pmn2_1	0.3457	0.118553	N/A	N/A	N/A	N/A	N/A	N/A	N/A	N/A	N/A	0.0035	N/A	N/A	[]	8.2797	10.5166	11.0534	962.466	FALSE	TRUE	['Na4SnTe4', 'NaTe3', 'As', 'SnTe']		NaSnTe3As	156.95	2538.88	-146.29	54.33	16.77	272.26	193.8	10.23	0.8562	0.8003
m-377	NaSnAsO3	Pmn2_1	1.2465	0.120158	1.7196	1e+20	1300	2.11676	2.5e+20	1300	39.91	7.5e+20	1300	38.376	7.5e+20	1300	[]	6.77548	8.72853	7.04357	416.557	FALSE	FALSE	['Na2SnO3', 'As', 'NaAsO2', 'SnO2']		NaSnAsO3	10.77	174.93	-177.45	5.51	9.96	161.76	154.83	3.88	1.4439	0.7097
m-433	KSnAsSe3	Pmn2_1	1.1138	0.121348	2.04047	1e+21	1300	2.1341	1e+21	1150	67.39	1e+21	1300	38.9255	1e+22	1300	[]	7.72796	10.7013	11.4839	949.71	FALSE	FALSE	['As2Se3', 'K2Sn2Se5', 'As']		KSnAsSe3	0	0	0	0	0	0	0	0	0	0
m-374	NaBiTe3Pb	Pmn2_1	0.6157	0.121701	1.68424	1e+21	1250	1.86801	1e+21	900	58.68	1e+21	1300	48.4912	1e+22	1300	[]	9.07273	11.6257	9.29523	980.431	FALSE	FALSE	['TePb', 'Bi2Te3', 'Na2Te']		NaBiTe3Pb	0	0	0	0	0	0	0	0	0	0
m-322	NaSnPSe3	Pmn2_1	1.0819	0.121939	1.83786	7.5e+19	1300	1.9572	2.5e+20	1300	38.29	2.5e+20	1300	30.1769	7.5e+20	1250	[]	7.58379	9.78581	10.4476	775.356	FALSE	FALSE	['P', 'SnSe', 'SnPSe3', 'Na2PSe3']		NaSnPSe3	25.65	413.96	-100.96	4.22	0.76	12.35	183.05	0.41	0.5801	1.7027
m-323	NaSnPS3	Pmn2_1	1.3664	0.123124	1.83973	1e+20	1300	1.4417	2.5e+20	1300	33.49	5e+20	1300	22.2353	7.5e+21	600	[]	7.20722	9.48553	10.0204	685.038	FALSE	FALSE	['Na3PS4', 'SnS', 'P', 'SnPS3']		NaSnPS3	49.78	806.11	-94.63	7.22	6.72	109.31	200.83	4.41	0.4896	2.0586
m-426	KSnBiS3	Pmn2_1	1.2323	0.123819	1.81964	1e+21	1300	1.5954	1e+21	1300	53	1e+21	1300	24.3075	1e+22	1300	[]	7.78568	10.5955	11.1233	917.591	FALSE	FALSE	['Bi2S3', 'Bi', 'K2Sn2S5']		KSnBiS3	0	0	0	0	0	0	0	0	0	0
m-383	KSnSbSe3	Pmn2_1	1.216	0.124615	1.90683	1e+20	1250	2.2899	1e+21	1200	65.58	1e+21	1300	35.0451	1e+22	1150	[]	7.96499	10.9531	11.4821	1001.72	FALSE	FALSE	['KSbSe2', 'SnSe']		KSnSbSe3	0	0	0	0	0	0	0	0	0	0
m-317	NaGeSbTe3	Pmn2_1	0.3362	0.124711	0.901621	1e+21	1300	0.914432	1e+21	700	39.84	1e+21	1100	50.0517	1e+21	750	[]	8.22203	10.564	11.2522	977.335	FALSE	FALSE	['GeTe', 'Na4Ge2Te5', 'Ge', 'Sb2Te3']		NaGeSbTe3	0	0	0	0	0	0	0	0	0	0
m-452	KSnAsO3	Pmn2_1	1.3365	0.124973	1.64858	1e+20	1300	1.99013	2.5e+20	1300	39.88	7.5e+20	1300	36.4491	7.5e+20	1300	[]	6.73453	9.55904	7.39549	476.089	FALSE	FALSE	['KAsO2', 'SnO']		KSnAsO3	N/A	N/A	N/A	N/A	N/A	N/A	N/A	N/A	1.6562	0.8498
m-366	NaBiPbS3	Pmn2_1	0.9728	0.125185	1.51865	7.5e+19	1300	1.62204	1e+20	1300	35.41	5e+20	1300	34.1766	5e+20	1300	[]	8.33332	10.6305	8.48402	751.579	FALSE	FALSE	['PbS', 'NaBiS2']		NaBiPbS3	16.7	271.24	-159.23	6.88	24.43	396.25	134.6	7.18	1.1234	0.8272
m-595	KGeBiTe3	Pmn2_1	0.2556	0.125764	0.897011	1e+21	850	1.15269	1e+21	600	66.71	1e+21	1050	58.5389	1e+22	1150	[]	8.74639	12.8994	8.4336	951.506	FALSE	FALSE	['K3GeTe3', 'Ge', 'Bi2Te3', 'GeTe']		KGeBiTe3	0	0	0	0	0	0	0	0	0	0
m-437	KSnAsS3	Pmn2_1	1.4979	0.127214	2.34956	1e+21	1300	1.69068	1e+21	1300	67.87	1e+21	1300	29.7534	1e+22	1300	[]	7.39007	10.1897	11.1621	840.531	FALSE	FALSE	['SnS', 'K2Sn(AsS3)2', 'As', 'K2Sn2S5']		KSnAsS3	0	0	0	0	0	0	0	0	0	0
m-315	NaSnSbO3	Pmn2_1	1.3121	0.128069	2.16924	1e+20	1300	1.64817	2.5e+20	1300	67.58	1e+21	1300	22.4093	5e+20	1300	[]	6.7638	8.66788	7.82309	458.65	FALSE	FALSE	['Na2SnO3', 'Na2Sb4O7', 'Sb', 'SnO2']		NaSnSbO3	34.8	564.41	-176.58	17.6	23.13	375.97	181.35	12.36	1.3734	0.8831
m-469	CuGeTe3P	Pmn2_1	0	0.128337	N/A	N/A	N/A	N/A	N/A	N/A	N/A	N/A	N/A	0	N/A	N/A	[]	7.98418	9.23993	10.0052	738.118	FALSE	FALSE	['Cu2P7', 'GeTe', 'Te', 'Cu2GeTe3']		CuGeTe3P	0	0	0	0	0	0	0	0	0	0
m-379	NaGeTe3As	Pmn2_1	0.0586	0.130124	N/A	N/A	N/A	N/A	N/A	N/A	N/A	N/A	N/A	0.0006	N/A	N/A	[]	7.98481	10.4437	11.2754	940.269	FALSE	FALSE	['GeTe', 'Te3As2', 'As', 'Na4Ge2Te5']		NaGeTe3As	8.09	130.73	-62.54	0.51	54.97	887.9	142.04	17.91	0.9789	1.5119
m-393	KSnSbO3	Pmn2_1	1.5862	0.13171	2.00853	1e+20	1300	1.54456	2.5e+20	1300	47.62	7.5e+20	1300	21.8526	5e+20	1300	[]	6.80598	9.4582	8.34331	537.078	FALSE	FALSE	['KSbO2', 'SnO']		KSnSbO3	40.62	658.94	-167.41	18.47	26.24	425.92	166.27	11.77	1.1548	0.8063
m-361	NaGeBiS3	Pmn2_1	1.0568	0.132827	1.66192	7.5e+19	1300	1.33027	2.5e+20	1300	31.84	2.5e+20	1300	17.1982	7.5e+20	1300	[]	7.4724	9.53165	10.1588	723.551	FALSE	FALSE	['NaBiS2', 'Na2Ge2S5', 'Ge', 'Bi2S3']		NaGeBiS3	45.85	740.26	-110.43	9.03	0.29	4.8	191.05	0.18	0.4652	3.5303
m-347	NaSnBiSe3	Pmn2_1	0.7443	0.133612	1.47522	1e+21	1300	1.59346	1e+21	1100	51.57	1e+21	1300	27.2606	1e+21	1050	[]	8.11884	10.0625	10.3966	849.362	FALSE	FALSE	['SnSe', 'NaBiSe2']		NaSnBiSe3	0	0	0	0	0	0	0	0	0	0
m-384	KSnSbS3	Pmn2_1	1.5097	0.133941	2.21539	1e+21	1300	1.68165	1e+21	1300	69.35	1e+21	1300	22.0684	1e+22	1300	[]	7.64503	10.464	11.1769	894.125	FALSE	FALSE	['KSbS2', 'SnS']		KSnSbS3	0	0	0	0	0	0	0	0	0	0
m-335	NaPPbSe3	Pmn2_1	1.1145	0.134673	1.76776	1e+20	1300	1.65478	2.5e+20	1300	33.52	5e+20	1300	23.0251	7.5e+20	1300	[]	8.01006	10.1872	9.3801	765.419	FALSE	FALSE	['PbSe', 'PPbSe3', 'Na2PSe3', 'P']		NaPPbSe3	18.29	297.57	-147.44	6.47	2.24	36.32	142.56	0.74	0.6367	1.1677
m-380	NaGeAsS3	Pmn2_1	1.3528	0.134763	1.96431	7.5e+19	1300	1.86465	2.5e+20	1300	44.1	2.5e+20	1300	28.095	1e+21	1300	[]	7.07337	9.34111	10.274	678.835	FALSE	FALSE	['Na2Ge2S5', 'AsS', 'As']		NaGeAsS3	105.58	1702.23	-98.45	16.5	4.42	71.95	201.98	2.94	0.4605	1.8138
m-512	SiAgSbTe3	Pmn2_1	0	0.135488	0.193888	1e+22	1300	0.115692	1e+16	1300	28.94	1e+22	1300	15.5184	1e+21	700	[]	8.15092	9.81272	10.5474	843.612	FALSE	FALSE	['Te', 'Sb2Te3', 'Ag2Te', 'Si']		SiAgSbTe3	119.45	1931.04	-97.09	18.2	53.81	868.98	131.9	15.12	0.1317	0.3687
m-400	KGeSbSe3	Pmn2_1	1.0731	0.135768	1.93075	1e+21	1300	1.9353	1e+21	1200	74.1	1e+21	1300	39.0899	1e+21	850	[]	7.66654	10.6294	11.6322	947.922	FALSE	FALSE	['Sb', 'K2Ge2Se5', 'Sb2Se3']		KGeSbSe3	148.89	2399.01	-91.5	20.09	11.19	181.39	155.51	4.39	0.6098	2.0276
m-345	NaSnBiTe3	Pmn2_1	0.4316	0.136002	0.943423	1e+21	1200	1.31022	1e+21	750	38.75	1e+21	1250	40.0873	1e+21	750	[]	8.6855	10.9125	10.4863	993.902	FALSE	FALSE	['Sn(BiTe2)2', 'Na2Te', 'SnTe']		NaSnBiTe3	192.56	3117.57	-97.74	29.78	100.15	1624.9	129.39	27.2	0.1198	0.2161
m-454	KAsPbSe3	Pmn2_1	1.1653	0.136516	1.85983	1e+21	1300	2.45462	1e+21	1200	62.33	1e+21	1300	37.8111	1e+22	1100	[]	7.95944	11.2134	10.4081	928.946	FALSE	FALSE	['PbSe', 'KAsSe2']		KAsPbSe3	6.66	108.37	-172.79	3.24	2.23	36.21	143.73	0.75	0.9533	1.3569
m-331	NaPPbS3	Pmn2_1	1.4369	0.136971	2.58285	2.5e+20	1300	1.50909	2.5e+20	1300	47.6	1e+21	1300	18.5925	2.5e+21	50	[]	7.78354	9.41849	9.17695	672.755	FALSE	FALSE	['PbS', 'P', 'Na6P4Pb3S16', 'Na3PS4']		NaPPbS3	44.03	714.45	-125.64	11.28	3.3	53.6	129.16	0.89	0.5664	1.2137
m-333	NaGePS3	Pmn2_1	1.5241	0.13771	2.0319	7.5e+19	1300	1.65754	2.5e+20	1300	48.15	5e+20	1300	25.3218	1e+21	1300	[]	6.89183	9.23396	10.237	651.468	FALSE	FALSE	['P4S3', 'Na2Ge2S5', 'P']		NaGePS3	17.58	283.73	-69.15	1.36	5.66	92.17	204.07	3.84	0.4969	2.0093
m-389	KSnSbTe3	Pmn2_1	0.6122	0.138177	1.15417	1e+21	1300	1.30337	1e+21	900	48.29	1e+21	1300	46.2334	1e+22	50	[]	8.50603	11.864	11.4705	1157.55	FALSE	FALSE	['Sn(SbTe2)2', 'SnTe', 'K3SbTe3']		KSnSbTe3	61.75	1002.29	-188.09	35.46	14.77	240.09	192.04	8.85	0.6024	0.7906
m-360	NaGeBiSe3	Pmn2_1	0.7906	0.13836	1.51797	1e+21	1300	2.20443	1e+21	950	56.63	1e+21	1300	46.5189	1e+22	1200	[]	7.82488	9.81972	10.4546	803.311	FALSE	FALSE	['Na4Ge2Se5', 'Bi2Se3', 'Ge', 'GeSe']		NaGeBiSe3	145.93	2352.98	-115.25	31.25	18.71	303.86	175.96	9.41	0.4314	1.1625
m-353	NaSnBiS3	Pmn2_1	0.947	0.138404	1.59827	7.5e+19	1300	1.33209	2.5e+20	1300	30.92	2.5e+20	1300	18.0246	5e+20	1300	[]	7.8154	9.64137	9.96343	750.756	FALSE	TRUE	['NaBiS2', 'SnS']		NaSnBiS3	89.71	1448.69	-121.54	21.4	42.18	682.37	151.73	15.71	0.4254	0.5622
m-585	AgBiPbO3	Pmn2_1	0.973	0.141988	1.30263	5e+19	1300	1.77065	2.5e+20	1300	27.62	1e+21	1300	26.1284	7.5e+20	1300	[]	7.31512	8.919	7.07623	461.678	FALSE	FALSE	['Ag', 'Ag5(PbO3)2', 'Pb3O4', 'Bi2O3']		AgBiPbO3	36.45	589.02	-102.8	6.22	11.72	190.24	137.62	3.6	0.4113	0.8698
m-397	KSbPbSe3	Pmn2_1	1.2332	0.145445	2.01813	1e+20	1300	2.52536	1e+21	1250	65.93	1e+21	1300	37.5138	1e+22	1300	[]	8.19263	11.3512	10.6415	989.623	FALSE	TRUE	['PbSe', 'KSbSe2']		KSbPbSe3	4.31	70	-136.09	1.3	7.34	119.54	194.8	4.54	0.9547	1.713
m-398	KSbPbS3	Pmn2_1	1.5794	0.14587	2.1089	1e+20	1300	2.08923	1e+21	1300	64.82	1e+21	1300	22.6384	1e+21	950	[]	7.88366	10.9146	10.4916	902.773	FALSE	FALSE	['KSbS2', 'PbS']		KSbPbS3	7.96	129.46	-180.16	4.2	1.61	26.26	154.63	0.63	1.4347	2.3691
m-434	KSnTe3As	Pmn2_1	0.3193	0.147767	0.61634	1e+21	900	0.872196	1e+21	600	39.49	1e+21	950	43.6971	1e+21	700	[]	8.27117	11.6379	11.4262	1099.88	FALSE	TRUE	['K2SnTe5', 'SnTe', 'As']		KSnTe3As	21.93	356.61	-189.56	12.81	6.37	103.69	143.3	2.13	0.7145	1.6584
m-607	SiCuSbTe3	Pmn2_1	0	0.148336	0.270761	1e+22	1300	0.117685	1e+22	1250	32.14	1e+22	1300	18.4999	1e+22	1300	[]	8.15567	9.20052	10.134	760.42	FALSE	FALSE	['Si', 'Sb2Te3', 'SiCu2Te3']		SiCuSbTe3	0	0	0	0	0	0	0	0	0	0
m-334	NaGePSe3	Pmn2_1	0.9888	0.148792	1.77008	1e+20	1300	1.70809	2.5e+20	1300	48.44	2.5e+20	1300	37.4255	5e+20	1300	[]	7.29244	9.63475	10.6671	749.477	FALSE	FALSE	['P', 'GeSe2', 'Na2Ge2Se5', 'Na2PSe3']		NaGePSe3	6.76	108.93	-34.01	0.13	8.78	142.27	131.95	2.48	0.8538	1.8277
m-363	NaBiPbSe3	Pmn2_1	1.0349	0.150978	1.75812	1e+20	1200	2.15368	1e+21	1150	54.96	1e+21	1300	39.6835	1e+22	1300	[]	8.42094	10.0234	9.93141	838.275	FALSE	FALSE	['PbSe', 'NaBiSe2']		NaBiPbSe3	69.22	1120.84	-120.8	16.36	48.94	793.4	131.16	13.65	0.6594	0.4563
m-396	KGeSbTe3	Pmn2_1	0.3901	0.15177	0.808211	1e+21	1100	0.940178	1e+21	650	50.87	1e+21	1050	117.602	1e+22	50	[]	8.23809	11.3976	12.0003	1126.76	FALSE	FALSE	['Sb2Te3', 'GeTe', 'K3GeTe3', 'Ge']		KGeSbTe3	192.86	3106.78	-69.53	15.02	115.66	1868.27	140.06	36.65	0.4865	1.5783
m-617	SiAgTe3As	Pmn2_1	0	0.15247	0.0970529	1e+22	1300	0.0791136	1e+16	1050	25.01	1e+22	1250	13.7925	1e+21	450	[]	7.9171	9.83089	10.2282	796.082	FALSE	FALSE	['Ag2Te', 'Te', 'SiAs']		SiAgTe3As	10.2	164.87	-126.3	2.63	12.2	196.96	149.27	4.39	0.2625	0.259
m-450	KGeTe3As	Pmn2_1	0.1107	0.153021	0.353869	1e+16	1300	0.495945	1e+21	350	27.16	1e+21	650	40.7044	1e+21	450	[]	8.03345	11.1968	12.1815	1095.72	FALSE	FALSE	['Te3As2', 'GeTe', 'K3GeTe3', 'As']		KGeTe3As	93.75	1513.02	-108.11	17.68	105.44	1701.68	125.31	26.72	0.5819	1.5346
m-602	KSnPS3	Pmn2_1	1.2275	0.153454	2.31501	1e+21	1300	2.10058	1e+21	1300	65.58	1e+21	1300	24.9461	1e+21	1200	[]	7.31736	10.6797	9.42342	736.411	FALSE	FALSE	['SnPS3', 'P', 'SnS', 'K3PS4']		KSnPS3	165.9	2676.82	-100.23	26.89	12.89	209.89	208.18	9.1	0.3643	2.5087
m-492	SiCuTe3As	Pmn2_1	0	0.153606	0.0983346	1e+21	1050	0.126745	1e+22	1300	9.73	1e+21	1050	14.4901	1e+22	1300	[]	7.94609	9.1515	9.91293	720.855	FALSE	FALSE	['SiCu2Te3', 'SiAs2', 'Te']		SiCuTe3As	2.97	48.16	-201.02	1.95	1.72	27.74	134.71	0.5	0.0586	0.1692
m-362	NaGeBiTe3	Pmn2_1	0.191	0.153656	N/A	N/A	N/A	N/A	N/A	N/A	N/A	N/A	N/A	0.0019	N/A	N/A	[]	8.39393	10.7788	10.763	973.799	FALSE	FALSE	['Bi2Te3', 'Ge', 'Na4Ge2Te5', 'GeTe']		NaGeBiTe3	246.89	3988.35	-66.48	17.63	102.41	1659.35	110.44	20.24	0.2968	0.2673
m-425	KSnBiSe3	Pmn2_1	0.9717	0.155309	1.52297	1e+21	1300	1.92036	1e+21	1050	50.34	1e+21	1300	30.2469	1e+22	1300	[]	8.09242	11.0813	11.3556	1018.31	FALSE	FALSE	['Bi', 'K2Bi8Se13', 'K3SnSe3', 'SnSe']		KSnBiSe3	182.55	2946.27	-121.14	43.24	22.36	362.09	163.54	9.68	0.3878	0.5708
m-560	SiAgBiTe3	Pmn2_1	0	0.157172	0.13443	1e+22	1300	0.108358	1e+16	1300	18.1	1e+22	1300	12.4621	1e+21	650	[]	8.34734	9.85759	10.3423	851.011	FALSE	FALSE	['Bi2Te3', 'Ag2Te', 'Te', 'Si']		SiAgBiTe3	10.23	165.15	-85.2	1.2	2.66	43.32	181.23	1.42	0.2844	0.4646
m-402	KSnPSe3	Pmn2_1	1.2654	0.158607	2.31893	1e+21	1300	2.30486	1e+21	1200	72.27	1e+21	1300	46.4119	1e+22	1200	[]	7.58077	10.4981	11.4567	911.767	FALSE	FALSE	['K2PSe3', 'P', 'SnPSe3', 'SnSe']		KSnPSe3	195.02	3144.88	-85.71	23.1	31.11	505.56	165.02	13.77	0.349	0.8135
m-604	KSnBiO3	Pmn2_1	0.5929	0.158847	1.93082	1e+21	1100	1.10081	1e+21	1150	59.57	1e+22	1300	28.6207	1e+21	1200	[]	6.91463	9.90621	7.73202	529.626	FALSE	FALSE	['K2SnO3', 'Bi', 'Sn2Bi2O7', 'SnO2']		KSnBiO3	62.54	1013.67	-160.64	26.16	81.29	1315.94	119.17	18.69	0.91	0.398
m-399	KGeSbS3	Pmn2_1	1.5867	0.160731	2.36242	1e+21	1300	2.06738	1e+21	1300	72.47	1e+21	1300	46.0595	1e+22	1300	[]	7.29332	10.1995	11.2997	840.563	FALSE	FALSE	['Sb2S3', 'K2Ge2S5', 'Sb']		KGeSbS3	165.02	2659.89	-106.75	30.31	5.1	82.97	193.05	3.09	0.3685	2.9592
m-606	KGeBiSe3	Pmn2_1	0.846	0.161301	1.36373	1e+21	1300	1.38041	1e+21	1000	60.57	1e+21	1300	48.0716	1e+22	1300	[]	7.8398	9.79941	13.7702	1057.9	FALSE	FALSE	['K2Ge2Se5', 'K2GeSe3', 'Ge', 'K2Bi8Se13']		KGeBiSe3	124.52	2012.16	-141.88	40.5	32.27	523.38	202.65	21.49	0.8782	0.9791
m-605	KGeBiS3	Pmn2_1	1.3089	0.163053	1.71292	1e+20	1300	1.6642	1e+22	1300	52.14	1e+21	1300	44.7071	1e+22	1100	[]	7.48818	10.1279	12.0591	914.553	FALSE	TRUE	['Bi', 'KGeBiS4', 'K2Ge2S5']		KGeBiS3	135.83	2190.78	-115.06	29	6.13	99.8	191.91	3.68	0.4142	2.6027
m-447	KGeAsSe3	Pmn2_1	0.844	0.163957	1.76212	1e+21	1300	1.66709	1e+21	1050	76.95	1e+21	1300	48.5036	1e+21	950	[]	7.45847	10.4603	11.5504	901.135	TRUE	FALSE	['K2Ge2Se5', 'As2Se3', 'As']		KGeAsSe3	150.26	2420.73	-93.59	21.2	13.02	210.52	65.35	0.9	0.5909	2.8329
m-533	CuAsPbO3	Pmn2_1	1.1133	0.164702	2.50441	2.5e+20	1300	0.873413	2.5e+21	1300	46.16	1e+21	1300	9.1246	5e+21	1300	[]	7.05075	7.4025	7.46668	389.709	FALSE	FALSE	['Cu', 'As2Pb3O8', 'As2PbO4']		CuAsPbO3	37.2	602.95	-143.22	12.37	32.1	520.66	211.75	23.35	0.5644	0.8193
m-587	AgAsPbO3	Pmn2_1	1.5118	0.165636	1.55905	2.5e+20	1300	1.49437	1e+20	1300	17.62	5e+20	1300	24.0051	5e+20	1300	[]	7.38751	8.83667	6.74213	440.133	FALSE	FALSE	['As2PbO4', 'As2Pb3O8', 'Ag']		AgAsPbO3	8.31	135.03	-156.09	3.29	47.78	774.14	159.14	19.61	1.1628	0.8558
m-428	KSnBiTe3	Pmn2_1	0.3689	0.167804	0.654716	1e+21	1250	0.960508	1e+21	700	32.07	1e+21	1200	45.105	1e+22	50	[]	8.63611	12.0617	11.1611	1162.61	FALSE	FALSE	['K3SnTe3', 'Bi4Te3', 'Sn(BiTe2)2', 'SnTe']		KSnBiTe3	N/A	N/A	N/A	N/A	N/A	N/A	N/A	N/A	0.2207	0.0953
m-327	NaSnTe3P	Pmn2_1	0.4639	0.169038	1.14739	1e+21	950	1.07082	1e+21	800	52.91	1e+21	950	48.7302	1e+21	850	[]	8.13449	10.4716	11.0643	942.468	FALSE	FALSE	['Na4SnTe4', 'P', 'NaTe3', 'SnTe']		NaSnTe3P	91.75	1483.76	-116.06	19.99	37.54	606.72	132.47	10.65	0.5197	1.274
m-614	SiCuBiTe3	Pmn2_1	0	0.170835	0.152926	1e+22	1300	0.0864113	1e+22	950	17.86	1e+22	1300	12.2851	1e+22	1100	[]	8.29184	9.18916	10.0317	764.364	FALSE	FALSE	['Si', 'SiCu2Te3', 'Bi2Te3']		SiCuBiTe3	0	0	0	0	0	0	0	0	0	0
m-624	KSnTe3P	Pmn2_1	0.1287	0.176824	0.298874	1e+21	900	0.506337	1e+21	500	21.8	1e+21	900	30.2583	1e+21	550	[]	8.20509	11.498	9.63241	908.739	FALSE	FALSE	['P', 'K2SnTe5', 'SnTe']		KSnTe3P	262.33	4230.41	-86.17	31.41	81.85	1324.76	153.63	31.27	0.2826	1.4457
m-337	NaTe3PPb	Pmn2_1	0.6987	0.177601	2.01401	1e+21	1100	1.4884	1e+21	950	45.56	1e+21	1100	38.262	1e+22	1300	[]	8.62793	10.6428	9.88521	907.713	TRUE	FALSE	['NaTe3', 'P', 'TePb', 'Na2Te']		NaTe3PPb	28.83	467.84	-123.88	7.18	4.04	65.74	179.21	2.11	0.6006	1.0699
m-516	CuBiPbO3	Pmn2_1	0.2701	0.177694	0.798794	1e+20	1300	0.773853	1e+16	1300	47.89	7.5e+20	1300	35.5779	1e+16	1300	[]	7.11443	7.6223	7.54589	409.201	FALSE	FALSE	['Cu2PbO2', 'Bi2O3', 'PbO']		CuBiPbO3	42.93	695.46	-144.02	14.43	9.37	152.47	185.83	5.27	0.6073	0.9036
m-332	NaGeTe3P	Pmn2_1	0.1709	0.179614	0.493371	1e+21	1300	0.611752	1e+21	450	38.9	1e+21	700	49.5752	1e+21	550	[]	7.88641	10.2979	11.2967	917.445	FALSE	FALSE	['P', 'GeTe', 'NaTe3', 'Na4Ge2Te5']		NaGeTe3P	143.82	2320.94	-95.69	21.25	147.43	2380.29	127.17	38.49	0.5828	0.914
m-603	KGeTe3P	Pmn2_1	0	0.18313	0.147955	1e+21	450	0.401534	1e+22	1300	18.42	1e+21	500	23.9472	1e+21	400	[]	7.88389	9.29706	12.2157	895.374	FALSE	FALSE	['K2GeTe4', 'GeTe', 'Te', 'P']		KGeTe3P	293.34	4731.75	-78	28.79	99.85	1617.11	139.31	31.38	0.2157	0.5154
m-409	KPPbS3	Pmn2_1	1.5799	0.184081	1.91641	1e+20	1300	1.13912	2.5e+20	1300	34.02	5e+20	1300	11.5806	5e+20	1250	[]	7.4036	10.3754	10.3571	795.589	FALSE	FALSE	['KPPbS4', 'PbS', 'P', 'K3PS4']		KPPbS3	6.24	101.75	-215.29	4.72	14.71	238.74	213.12	10.84	5.2249	1.1442
m-307	SiCuSbSe3	Pmn2_1	0.0129	0.185034	0.346184	7.5e+20	1300	0.387296	5e+20	800	24.43	1e+21	1300	20.0341	7.5e+20	950	[]	7.55107	8.65943	9.47932	619.833	FALSE	FALSE	['Sb2Se3', 'SiSe2', 'Sb', 'Cu']		SiCuSbSe3	70.45	1138.11	-92.5	9.74	21.24	344.46	186.8	12.02	0.3168	0.6628
m-407	KGePS3	Pmn2_1	1.6439	0.187215	N/A	N/A	N/A	N/A	N/A	N/A	N/A	N/A	N/A	0.0164	N/A	N/A	[]	6.92286	9.83827	11.2458	765.941	FALSE	FALSE	['K2Ge2S5', 'P', 'P4S3']		KGePS3	0	0	0	0	0	0	0	0	0	0
m-446	KGeAsS3	Pmn2_1	1.5358	0.188201	2.28731	1e+21	1300	2.46398	1e+21	1300	78.9	1e+21	1300	53.5226	1e+22	1100	[]	7.08431	9.97645	11.3049	798.985	FALSE	FALSE	['AsS', 'K2Ge2S5', 'As']		KGeAsS3	0	0	0	0	0	0	0	0	0	0
m-406	KGePSe3	Pmn2_1	1.0241	0.190935	2.18122	1e+21	1300	1.84209	1e+21	1150	91.12	1e+21	1300	47.6992	1e+21	900	[]	7.31994	10.3041	11.5726	872.872	FALSE	FALSE	['K2Ge2Se5', 'PSe', 'P']		KGePSe3	288.52	4649.81	-83.42	32.36	27.22	442.63	201.21	17.92	0.3086	1.1381
m-473	CuSbPbO3	Pmn2_1	0.8376	0.19701	2.14335	1e+20	1300	1.50926	1e+22	1050	62.73	7.5e+20	1300	19.2308	1e+16	1300	[]	7.09107	7.47211	7.62541	404.035	TRUE	FALSE	['Sb2PbO6', 'Sb2O3', 'Cu', 'PbO']		CuSbPbO3	20.76	337.13	-177.26	10.59	19.27	312.82	195.71	11.98	0.5297	0.7186
m-328	NaGeSbO3	Pmn2_1	1.5734	0.198692	1.55282	7.5e+19	1300	1.17905	7.5e+20	1300	46.94	1e+21	1300	12.853	7.5e+20	650	[]	6.29838	8.20587	8.47937	438.245	FALSE	FALSE	['Na2GeO3', 'Sb', 'Na4Ge9O20', 'Na2Sb4O7']		NaGeSbO3	11.61	188.14	-159.16	4.77	5.84	94.99	198.95	3.76	1.3563	0.9872
m-589	AgPbNO3	Pmn2_1	1.2647	0.201348	0.266879	1e+16	1300	1.5302	1e+20	1300	4.32	7.5e+21	550	30.0348	5e+20	1300	[]	6.05297	11.8881	8.23824	592.81	TRUE	FALSE	['PbO', 'Ag', 'Pb(NO3)2', 'N2']		AgPbNO3	N/A	N/A	N/A	N/A	N/A	N/A	N/A	N/A	2.5381	2.3446
m-618	AgSbPbO3	Pmn2_1	1.2729	0.201431	2.36884	1e+21	1300	1.82337	1e+21	1300	42.8	1e+22	1300	105.522	1e+22	50	[]	7.39232	8.91171	6.96515	458.851	FALSE	FALSE	['Sb2O3', 'Sb2PbO6', 'Ag', 'PbO']		AgSbPbO3	25.12	408.09	-160.31	10.49	48.19	780.18	133.22	13.85	0.8829	0.6186
m-504	SiAgSbSe3	Pmn2_1	0.5273	0.203759	1.05819	2.5e+20	1300	1.29944	5e+20	1150	30.06	2.5e+20	1300	30.2512	7.5e+20	1150	[]	7.49263	9.29993	10.2239	712.411	FALSE	FALSE	['Ag', 'Sb2Se3', 'Sb', 'SiSe2']		SiAgSbSe3	38.15	616.61	-108.23	7.22	6.33	103.02	189.25	3.69	0.4132	0.6008
m-601	KGeSbO3	Pmn2_1	1.7541	0.204833	2.41896	1e+21	1300	1.83617	1e+21	1300	82.68	1e+22	1300	24.8201	1e+22	1200	[]	6.36341	9.19365	8.58542	502.273	FALSE	FALSE	['KSbO2', 'K4Ge9O20', 'Sb', 'K2Ge2O5']		KGeSbO3	51.66	837.2	-154.62	20.02	21.83	355.86	223.82	17.83	1.0132	2.1743
m-625	CuPbNO3	Pmn2_1	1.3395	0.20596	0.545613	1e+22	1300	1.86334	1e+21	1300	6.65	1e+22	350	39.3715	1e+22	1300	[]	6.1585	9.22949	9.22697	524.459	FALSE	FALSE	['Pb(NO3)2', 'N2', 'CuO', 'PbO']		CuPbNO3	0.07	1.18	-211.69	0.05	53.7	873.64	137.2	16.45	5.8645	0.9201
m-356	NaSnBiO3	Pmn2_1	0.253	0.2073	1.09998	2.5e+20	900	0.395842	2.5e+20	1100	51.46	7.5e+20	1300	14.4765	7.5e+21	1300	[]	6.88974	9.00773	7.38521	458.333	TRUE	FALSE	['Sn2Bi2O7', 'SnO2', 'Bi', 'Na2SnO3']		NaSnBiO3	22.01	357.23	-177.25	11.22	25.24	409.38	164.13	11.03	1.047	1.13
m-490	SiCuBiSe3	Pmn2_1	0	0.208164	0.176761	7.5e+20	1300	0.146975	1e+21	750	14.3	1e+21	1300	11.3916	1e+21	800	[]	7.73751	8.61657	9.31646	621.136	FALSE	FALSE	['Cu', 'Bi2Se3', 'SiSe2', 'Si4Cu15']		SiCuBiSe3	3.44	55.69	-131.59	0.96	1.75	28.42	161.06	0.74	0.7788	0.3724
m-390	NaGeAsO3	Pmn2_1	2.0176	0.208702	1.60588	7.5e+19	1300	1.90073	7.5e+20	1300	48.21	1e+21	1300	22.6792	1e+21	750	[]	6.09107	8.01341	8.40653	410.325	FALSE	FALSE	['As', 'Na2GeO3', 'NaAsO2', 'Na4Ge9O20']		NaGeAsO3	39.21	635.44	-162.81	16.84	10.33	168.23	223.85	8.43	0.9867	1.2232
m-413	KTe3PPb	Pmn2_1	0.496	0.215115	1.10973	1e+21	1000	1.07403	1e+21	750	28.42	1e+21	950	29.6883	1e+21	700	[]	8.67914	11.1671	10.4982	1017.49	FALSE	FALSE	['K2Te3', 'P', 'TePb', 'Te']		KTe3PPb	24.89	404.49	-127.29	6.55	5	81.18	123.97	1.25	0.5041	1.3823
m-556	SiAgBiSe3	Pmn2_1	0.2393	0.220185	0.524062	2.5e+20	1250	0.73488	2.5e+20	700	21.78	5e+20	1300	22.067	5e+20	800	[]	7.6961	9.33779	10.0121	719.516	FALSE	FALSE	['Bi2Se3', 'Bi', 'SiSe2', 'Ag']		SiAgBiSe3	120.13	1940.25	-107.13	22.27	0.76	12.33	146.19	0.26	0.398	0.604
m-309	NaSiSbTe3	Pmn2_1	0.2759	0.220732	0.786526	1e+21	1300	0.810832	1e+21	600	32.98	1e+21	1000	47.477	1e+21	700	[]	8.09928	10.5502	11.2168	958.465	FALSE	FALSE	['Sb2Te3', 'Te', 'Na4Si2Te5', 'Si']		NaSiSbTe3	154.1	2489.6	-101.24	25.52	42.83	691.85	129.66	11.63	0.3259	1.2518
m-571	SiAgAsSe3	Pmn2_1	0.4893	0.223726	0.942828	1e+20	950	1.09891	2.5e+20	1000	36.36	5e+20	1300	32.5137	5e+20	1150	[]	7.23908	9.23107	10.2285	683.517	FALSE	FALSE	['SiSe2', 'Ag3AsSe3', 'As']		SiAgAsSe3	140.51	2270.87	-116.92	31.04	20.2	327.39	134.91	5.96	0.4901	0.6775
m-493	SiCuAsSe3	Pmn2_1	0.0437	0.226416	0.286866	1e+21	700	0.408778	1e+21	500	43.98	1e+22	1300	33.6962	1e+22	1250	[]	7.29809	8.62736	9.4636	595.86	FALSE	FALSE	['CuAsSe', 'SiSe2']		SiCuAsSe3	207.47	3353.34	-104.96	36.94	80.84	1310.05	170.08	37.9	0.5042	0.5014
m-467	SiCuTe3P	Pmn2_1	0	0.22703	0.139552	1e+21	1100	0.140374	1e+22	1300	19.67	1e+21	1150	16.7926	1e+22	1300	[]	7.83197	9.13557	9.92396	710.054	FALSE	FALSE	['Te', 'SiP', 'CuTe']		SiCuTe3P	87.08	1408.91	-135.42	25.84	46.06	744.2	134.33	13.43	0.4631	0.2438
m-370	NaSiTe3As	Pmn2_1	0.0182	0.230939	0.35422	1e+16	1200	0.364797	1e+21	1150	20.72	1e+22	1300	34.2578	1e+21	400	[]	7.8597	10.3653	11.3129	921.64	TRUE	FALSE	['Te', 'SiAs2', 'Na4Si2Te5']		NaSiTe3As	0	0	0	0	0	0	0	0	0.6119	1.223
m-526	SiAgTe3P	Pmn2_1	0	0.232854	0.123642	1e+22	1300	0.0736658	1e+21	350	33.39	1e+22	1300	12.1678	1e+21	450	[]	7.7732	9.71411	10.5921	799.807	TRUE	FALSE	['Ag2Te', 'SiP', 'Te']		SiAgTe3P	10.28	166.14	-111.69	2.07	10.59	170.96	152.36	3.97	0.5064	0.6778
m-387	KSiSbTe3	Pmn2_1	0.3744	0.232862	0.722106	1e+21	1050	0.940865	1e+21	700	44.06	1e+21	1050	47.7376	1e+21	750	[]	8.09173	11.3793	12.0609	1110.54	TRUE	FALSE	['Si', 'Te', 'Sb2Te3', 'K3SiTe3']		KSiSbTe3	336.53	5424.17	-85.6	39.74	117.35	1896.92	135.75	34.96	0.2625	1.215
m-440	KSiTe3As	Pmn2_1	0.0558	0.246347	0.273765	1e+16	1300	0.387785	1e+21	300	20.93	1e+21	550	38.1234	1e+21	350	[]	7.88453	11.1381	12.1639	1068.22	FALSE	FALSE	['SiAs', 'SiAs2', 'K3SiTe3', 'Te']		KSiTe3As	0	0	0	0	0	0	0	0	0	0
m-431	KSiBiSe3	Pmn2_1	0.7012	0.247304	1.48965	1e+21	1300	1.13303	1e+22	1250	51.36	1e+21	1300	38.0982	1e+22	1300	[]	7.6157	10.7327	11.6677	953.684	FALSE	FALSE	['SiSe2', 'Si', 'K2Bi8Se13', 'K3BiSe3']		KSiBiSe3	0	0	0	0	0	0	0	0	0	0
m-355	NaSiBiTe3	Pmn2_1	0.1205	0.248011	0.513443	1e+21	1200	0.46142	1e+21	450	21.3	1e+21	1050	32.0176	1e+21	500	[]	8.27162	10.7585	10.7087	952.972	FALSE	FALSE	['Te', 'Na4Si2Te5', 'Si', 'Bi2Te3']		NaSiBiTe3	468.48	7578.95	-61.71	28.86	92.9	1505.13	109.26	17.97	0.1344	0.3388
m-386	KSiSbSe3	Pmn2_1	1.0024	0.250323	2.08046	1e+21	1300	1.87865	1e+21	1000	67.25	1e+21	1300	51.9289	1e+22	1300	[]	7.5013	10.5917	11.685	928.392	FALSE	FALSE	['Sb', 'K3SbSe3', 'SiSe2']		KSiSbSe3	0	0	0	0	0	0	0	0	0.2694	1.3084
m-485	SiCuBiS3	Pmn2_1	0.0726	0.250826	0.403206	7.5e+20	1300	0.451347	5e+20	750	26.53	7.5e+20	1300	18.5329	7.5e+20	850	[]	7.35948	8.20912	8.8558	535.022	FALSE	FALSE	['Si2Cu5S7', 'Bi2S3', 'SiS2', 'Bi']		SiCuBiS3	30.92	501.16	-151.54	11.51	17.42	282.69	180.96	9.26	1.079	1.6175
m-359	NaPPbO3	Pmn2_1	1.3042	0.25159	2.3068	5e+20	1300	1.56193	7.5e+19	1300	29.57	1e+21	900	42.9451	5e+20	1300	[]	7.55217	8.70202	6.36486	418.293	FALSE	TRUE	['Pb', 'Na5P3O10', 'Na2P2PbO7', 'P']		NaPPbO3	12.33	200.41	-156.67	4.92	72.39	1171.71	174.66	35.74	0.9804	0.6371
m-349	NaSnPO3	Pmn2_1	1.3764	0.254285	2.0451	5e+20	1300	2.13215	5e+20	1300	24.28	1e+21	1050	25.9586	1e+21	1300	[]	7.12914	8.54464	6.24867	380.644	FALSE	TRUE	['NaPO3', 'Sn']		NaSnPO3	7.83	127.29	-189.69	4.58	15.57	252.53	154.77	6.05	1.1868	0.8171
m-458	SiCuSbS3	Pmn2_1	0.2878	0.257914	0.928814	5e+20	1300	0.779601	2.5e+20	1000	40.82	1e+21	1300	23.0762	7.5e+20	1300	[]	7.15008	8.24973	9.08535	535.911	FALSE	FALSE	['SiS2', 'Si2Cu5S7', 'Sb', 'Sb2S3']		SiCuSbS3	49.11	796.21	-137.14	14.97	40.64	659.18	155.44	15.93	0.8073	0.8081
m-311	NaSiSbSe3	Pmn2_1	0.7652	0.258255	1.53822	1e+20	1300	1.39098	5e+20	1250	33.05	2.5e+20	1300	24.8858	1e+21	1300	[]	7.48381	9.83129	10.7382	790.067	FALSE	FALSE	['Sb2Se3', 'Na2Si2Se5', 'Sb']		NaSiSbSe3	33.37	538.64	-102.27	5.63	3.15	51.22	187.83	1.81	0.4861	1.2644
m-620	CuSnAsO3	Pmn2_1	1.1155	0.261144	3.20015	1e+21	1300	1.58907	1e+16	1300	135.93	1e+22	1300	17.1849	1e+16	1300	[]	6.55727	7.6797	7.5411	379.754	FALSE	FALSE	['SnO2', 'As', 'Cu', 'As2O3']		CuSnAsO3	39.41	639.41	-160.54	16.48	0.1	1.57	210.75	0.07	0.6837	6.1941
m-527	SiAgPSe3	Pmn2_1	0.7047	0.263513	1.43471	1e+20	1050	1.44241	2.5e+20	1150	46.4	5e+20	1300	36.6489	5e+20	1300	[]	7.07978	9.1527	10.2455	663.898	FALSE	FALSE	['Ag2PSe3', 'SiSe2', 'Ag3P11', 'Ag7PSe6']		SiAgPSe3	104.6	1691.53	-134.07	30.4	65.57	1062.07	122.8	16.02	0.4338	0.6746
m-354	NaSiBiSe3	Pmn2_1	0.4594	0.264505	0.992544	1e+20	1250	0.611301	2.5e+20	850	27.05	2.5e+20	1300	13.6165	2.5e+21	1300	[]	7.6389	9.92449	10.4744	794.085	FALSE	FALSE	['Bi', 'Na2Si2Se5', 'Bi2Se3']		NaSiBiSe3	68.11	1100.02	-101.97	11.44	25.62	415.17	154.09	9.86	0.3686	0.519
m-444	KGeBiO3	Pmn2_1	0.3479	0.265054	0.622349	2.5e+20	1000	0.529788	1e+20	800	29.24	7.5e+20	1300	14.5372	2.5e+20	1100	[]	6.59852	9.80094	7.49516	484.725	FALSE	TRUE	['K2Ge2O5', 'Bi2O3', 'Bi']		KGeBiO3	22.07	358.23	-183.85	12.11	30.43	493.13	163.84	13.24	0.9972	0.9972
m-423	KSiBiTe3	Pmn2_1	0.1477	0.265158	0.388258	1e+21	1300	0.58555	1e+21	450	20.65	1e+21	950	38.0276	1e+21	550	[]	8.21935	11.6646	11.551	1107.46	TRUE	FALSE	['Bi2Te3', 'Te', 'K3SiTe3', 'Si']		KSiBiTe3	274.67	4449.73	-261.91	305.24	71.6	1171.59	6900.59	55788.9	0.3489	0.3293
m-596	SiCuPSe3	Pmn2_1	0.3903	0.269771	1.31692	1e+21	900	1.30609	1e+21	800	70.85	1e+22	1300	51.5825	1e+22	1300	[]	7.14373	8.55791	9.52814	582.507	FALSE	TRUE	['Cu3PSe4', 'SiSe2', 'Cu2P7', 'CuP2']		SiCuPSe3	0	0	0	0	0	0	0	0	0	0
m-584	AgSnAsO3	Pmn2_1	1.6854	0.269936	1.9803	2.5e+20	1300	2.07508	5e+20	1300	35.71	7.5e+20	1300	29.8556	1e+21	1300	[]	6.50469	8.24774	8.11158	435.178	TRUE	FALSE	['As', 'SnO2', 'Ag', 'As2O3']		AgSnAsO3	36.49	592.09	-174.96	18.12	4.81	78.26	172.01	2.32	1.0098	0.8398
m-430	KPPbO3	Pmn2_1	1.477	0.271133	2.00111	5e+20	1300	1.67656	1e+20	1300	30.86	1e+22	1300	35.4648	5e+20	1300	[]	7.61022	9.81827	5.98566	447.244	FALSE	TRUE	['KPO3', 'Pb']		KPPbO3	N/A	N/A	N/A	N/A	N/A	N/A	N/A	N/A	0.0038	0.9271
m-557	AgPbS3N	Pmn2_1	0.7539	0.275151	1.74209	2.5e+20	1200	1.45711	7.5e+20	1100	31.07	5e+20	1300	20.2464	7.5e+20	600	[]	7.79027	8.3174	8.7932	569.753	TRUE	FALSE	['S2N', 'Ag2S', 'N2', 'PbS']		AgPbS3N	15.05	244.03	-156.73	5.99	5.53	89.99	205.99	3.82	0.7431	1.3884
m-388	KSiSbS3	Pmn2_1	1.2111	0.276565	2.59106	1e+21	1300	1.16695	1e+22	1300	60.98	1e+21	1300	26.967	1e+22	1300	[]	7.09374	10.1193	11.2975	810.976	FALSE	TRUE	['Sb', 'K3SbS4', 'SiS2', 'K2S']		KSiSbS3	151.17	2438.72	-103.18	25.96	14.66	238.49	203.79	9.9	0.2887	1.9398
m-507	SiAgSbS3	Pmn2_1	0.8404	0.278564	1.91053	2.5e+20	1300	1.38603	2.5e+20	1300	36.1	5e+20	1300	19.2284	5e+20	1300	[]	7.08159	8.92564	9.91781	626.882	FALSE	FALSE	['Ag', 'Sb', 'Sb2S3', 'SiS2']		SiAgSbS3	37.98	616.34	-163.62	16.5	27.23	442.38	187.77	15.6	0.6967	1.0382
m-365	NaGeBiO3	Pmn2_1	0.7353	0.280941	1.41282	1e+20	1250	1.04994	2.5e+20	1300	38.24	5e+20	1300	18.5301	5e+20	1300	[]	6.50882	8.55963	7.90124	440.202	FALSE	FALSE	['Ge3(BiO3)4', 'Bi', 'Na4Ge9O20', 'Na2GeO3']		NaGeBiO3	15.1	245.15	-236.65	13.73	15.58	252.71	157.9	6.3	0.877	1.0324
m-455	KGeAsO3	Pmn2_1	2.2507	0.281779	2.007	1e+20	1300	2.17103	5e+20	1300	48.54	7.5e+20	1300	30.3918	2.5e+21	1300	[]	6.1855	8.63242	9.47164	505.746	FALSE	FALSE	['K4Ge9O20', 'K2Ge2O5', 'As', 'KAsO2']		KGeAsO3	32.93	533.71	-157.08	13.17	1.66	27	245.66	1.63	1.0063	2.4429
m-439	KSiAsSe3	Pmn2_1	0.8117	0.282597	1.81208	1e+21	1300	1.62365	1e+21	950	75.57	1e+21	1300	38.7739	1e+21	650	[]	7.27421	10.3744	11.6807	881.491	TRUE	FALSE	['K3AsSe3', 'As', 'SiSe2']		KSiAsSe3	109.77	1772.27	-101.09	18.11	7.82	126.93	163.85	3.41	0.684	1.137
m-367	NaSiAsSe3	Pmn2_1	0.7459	0.288957	1.27596	1e+20	1200	1.72129	5e+20	1100	39.3	2.5e+20	1300	35.8636	7.5e+20	900	[]	7.26095	9.7093	10.7603	758.587	TRUE	FALSE	['As2Se3', 'Na2Si2Se5', 'As']		NaSiAsSe3	97.02	1565.97	-106.32	17.7	0.4	6.55	168.28	0.19	0.5567	2.4651
m-340	CuSnSbO3	Pmn2_1	0.8496	0.291802	1.75468	1e+20	1300	1.20783	2.5e+21	1250	52.81	7.5e+20	1300	15.4465	1e+16	1300	[]	6.67915	7.5189	7.90257	396.866	TRUE	FALSE	['Sb', 'Sb2O3', 'SnO2', 'Cu']		CuSnSbO3	21.9	355.01	-168.06	10.03	0.29	4.78	215.47	0.22	0.7787	5.3987
m-613	CuGeAsO3	Pmn2_1	1.0853	0.293111	1.93835	1e+21	1300	1.16585	1e+22	1300	111.85	1e+22	1300	12.7011	1e+22	1300	[]	5.9947	7.41195	7.99006	355.018	FALSE	FALSE	['As', 'Cu', 'As2O3', 'GeO2']		CuGeAsO3	0	0	0	0	0	0	0	0	0	0
m-561	SiAgBiS3	Pmn2_1	0.4517	0.294385	1.1374	2.5e+20	1300	0.803742	2.5e+20	1000	30.38	5e+20	1300	15.0738	5e+20	1150	[]	7.27125	8.95602	9.74475	634.592	FALSE	FALSE	['Ag', 'Bi', 'Bi2S3', 'SiS2']		SiAgBiS3	71.12	1151.93	-139.68	22.47	23.1	375.41	176.03	11.63	0.7422	0.9616
m-517	AgSnSbO3	Pmn2_1	1.4358	0.295893	1.96675	2.5e+20	1300	1.77658	2.5e+20	1300	43.13	1e+21	1300	27.6145	1e+21	1300	[]	6.72213	8.37844	8.14156	458.54	FALSE	FALSE	['Sb', 'Sb2O3', 'Ag', 'SnO2']		AgSnSbO3	34.1	553.58	-184.81	18.91	18.27	297.46	202.94	12.25	1.4029	1.3705
m-628	KSnPO3	Pmn2_1	1.1894	0.296371	2.1396	1e+21	1250	1.89514	1e+22	1300	39.62	1e+22	1100	33.9599	1e+22	1300	[]	7.24857	9.3102	6.12066	413.056	TRUE	FALSE	['KPO3', 'Sn']		KSnPO3	0	0	0	0	0	0	0	0	0	0
m-497	SiCuAsS3	Pmn2_1	0.4135	0.296463	1.09479	5e+20	1300	1.02297	2.5e+20	1100	44.37	1e+21	1300	29.0935	7.5e+20	1300	[]	6.84074	8.19103	9.10055	509.928	TRUE	FALSE	['CuAsS', 'SiS2']		SiCuAsS3	55.48	899.36	-141.18	17.93	41.1	666.63	157.45	16.53	0.7516	0.7886
m-325	NaSiTe3P	Pmn2_1	0.0995	0.298592	0.319081	1e+20	1300	0.480163	1e+21	400	29.41	1e+21	600	47.0904	1e+21	450	[]	7.72736	10.29	11.3105	899.343	FALSE	FALSE	['NaTe3', 'SiP']		NaSiTe3P	7.94	128.45	-124.71	2	4.69	75.74	125.4	1.19	0.2815	0.656
m-573	SiAgAsS3	Pmn2_1	0.9341	0.298773	1.95822	2.5e+20	1300	1.60117	2.5e+20	1300	44.63	7.5e+20	1300	22.7189	5e+20	1300	[]	6.80707	8.84477	9.89281	595.616	FALSE	FALSE	['AsS', 'SiS2', 'Ag']		SiAgAsS3	47.52	771.07	-152.86	18.02	24.76	402.25	192.38	14.89	0.6379	1.1288
m-594	CuGeSbO3	Pmn2_1	0.9096	0.30945	2.30238	1e+21	1300	1.70211	1e+16	1300	120.12	1e+22	1300	22.5276	1e+16	1300	[]	6.27719	7.56743	7.86862	373.777	FALSE	FALSE	['Sb', 'Ge3Sb2O9', 'Cu']		CuGeSbO3	71.64	1159.83	-128.3	19.09	3.13	51.03	254.17	3.3	0.4945	7.2761
m-403	KSiTe3P	Pmn2_1	0.1458	0.314418	0.361909	1e+21	550	0.570688	1e+21	400	41.18	1e+21	600	117.386	1e+22	100	[]	7.75529	10.9559	12.1871	1035.49	FALSE	FALSE	['K3SiTe3', 'SiP', 'SiP2', 'Te']		KSiTe3P	8.06	130.45	-139.57	2.54	5.09	82.23	119.3	1.17	0.3663	0.6789
m-441	KSiAsS3	Pmn2_1	1.2109	0.318492	2.07155	1e+20	1300	1.11207	7.5e+20	1300	48.69	5e+20	1300	25.0556	5e+21	700	[]	6.87369	9.878	11.3807	772.732	TRUE	FALSE	['K3As11', 'K3AsS4', 'SiS2', 'K2S']		KSiAsS3	95.55	1543.6	-120.17	22.29	3.08	50.18	214.94	2.32	0.4203	5.005
m-586	AgGeAsO3	Pmn2_1	1.5666	0.323431	2.12976	2.5e+20	1300	2.06692	5e+20	1300	35.08	7.5e+20	1300	28.8574	1e+21	1300	[]	6.05167	7.97036	8.5857	414.122	FALSE	FALSE	['Ag', 'GeO2', 'As2O3', 'As']		AgGeAsO3	26.61	431.63	-165.97	11.89	4.65	75.77	221.37	3.71	0.7312	1.5006
m-330	NaSiPSe3	Pmn2_1	0.9544	0.324279	1.67537	1e+20	1250	1.9856	2.5e+20	1150	49.28	5e+20	1300	40.287	7.5e+20	1100	[]	7.11558	9.60521	10.6963	731.058	TRUE	FALSE	['P', 'Na2Si2Se5', 'SiSe2', 'Na2PSe3']		NaSiPSe3	100.46	1621.19	-87.2	12.33	1.19	19.39	183.89	0.66	0.7117	1.1549
m-525	SiAgPS3	Pmn2_1	1.0465	0.326254	1.65417	1e+20	1300	1.83811	2.5e+20	1300	41.12	7.5e+20	1300	26.0159	7.5e+20	1300	[]	6.64232	8.7648	9.90855	576.862	FALSE	FALSE	['Ag', 'Ag3PS4', 'SiS2', 'Ag3P11']		SiAgPS3	0	0	0	0	0	0	0	0	0	0
m-405	KSiPSe3	Pmn2_1	0.9683	0.328991	2.19346	1e+21	1300	1.69929	1e+21	1050	92.33	1e+21	1300	73.5183	1e+22	50	[]	7.14415	10.1716	11.7204	851.688	FALSE	FALSE	['SiP2', 'K2PSe3', 'SiSe2']		KSiPSe3	0	0	0	0	0	0	0	0	0	0
m-470	SiCuPS3	Pmn2_1	0.7372	0.329647	2.15692	2.5e+20	1300	1.34192	2.5e+20	1300	69.86	1e+21	1300	28.4227	5e+20	1300	[]	6.7371	8.1265	9.07108	496.633	FALSE	FALSE	['Cu3PS4', 'Cu2P7', 'SiS2', 'CuP2']		SiCuPS3	7.72	125.5	-186.26	4.35	17.63	285.67	151.27	6.54	0.7205	0.7037
m-313	NaSiSbS3	Pmn2_1	0.9788	0.336546	1.85937	1e+20	1300	1.17874	5e+20	1300	32.49	2.5e+20	1300	14.7433	7.5e+20	1300	[]	7.08703	9.3901	10.3341	687.712	FALSE	FALSE	['Na2Si2S5', 'Sb', 'Sb2S3']		NaSiSbS3	35.31	571.72	-118.23	7.99	5.16	84.03	199.34	3.34	0.4123	1.8341
m-427	KSiBiS3	Pmn2_1	0.8061	0.33737	1.79945	1e+21	1300	1.08208	1e+22	1300	47.02	1e+21	1300	22.5666	1e+22	1300	[]	7.23076	10.299	11.2553	838.171	FALSE	TRUE	['Si', 'KSiBiS4', 'Bi', 'K2S']		KSiBiS3	0	0	0	0	0	0	0	0	0	0
m-548	AgGeSbO3	Pmn2_1	1.2785	0.34358	1.90533	2.5e+20	1300	1.82917	5e+20	1300	33.1	7.5e+20	1300	24.5723	1e+21	1300	[]	6.29515	8.10424	8.4977	433.531	FALSE	FALSE	['Ge3Sb2O9', 'Sb', 'Ag']		AgGeSbO3	13.94	226.1	-173.87	6.84	4.75	77.36	226.91	3.98	1.1568	1.7315
m-358	NaSiBiS3	Pmn2_1	0.5689	0.346825	1.21364	2.5e+20	1300	0.863179	5e+20	1150	27.77	5e+20	1300	13.7673	7.5e+20	1250	[]	7.23819	9.57704	10.1409	702.969	FALSE	FALSE	['Na2Si2S5', 'Bi2S3', 'Bi']		NaSiBiS3	17.97	290.84	-129.23	4.86	4.56	74.2	186.25	2.57	0.5265	1.2061
m-484	CuPbS3N	Pmn2_1	0.7253	0.347937	1.70738	2.5e+20	1100	1.51739	7.5e+20	1050	33.11	7.5e+20	1300	23.6785	1e+21	1050	[]	7.52369	7.93526	8.43901	503.829	TRUE	FALSE	['CuS2', 'N2', 'PbS']		CuPbS3N	13.47	219.02	-178.99	7.02	0.08	1.31	188.65	0.05	1.067	3.0387
m-505	CuSnBiO3	Pmn2_1	0.3642	0.350028	0.745327	5e+19	1300	0.735813	1e+16	1300	36.77	1e+21	1300	26.3725	1e+16	1300	[]	6.80475	7.64355	7.78477	404.905	TRUE	FALSE	['Sn2Bi2O7', 'Cu', 'Bi', 'SnO2']		CuSnBiO3	59.06	956.01	-124.76	14.88	3.56	58.02	252.59	3.7	0.5351	3.1964
m-515	CuGeBiO3	Pmn2_1	0.4954	0.357874	1.06925	1e+20	1250	0.914971	1e+16	1300	33.34	5e+20	1300	23.3428	1e+16	1300	[]	6.56334	7.63047	7.47247	374.232	FALSE	FALSE	['Cu', 'Bi', 'Ge3(BiO3)4', 'GeO2']		CuGeBiO3	103.46	1671.16	-99.37	16.5	65.65	1063.3	147.88	23.25	0.3759	0.54
m-566	AgSnBiO3	Pmn2_1	0.4776	0.364647	1.01768	2.5e+20	1300	0.821752	1e+20	1050	38.57	1e+21	1300	20.1627	5e+20	1300	[]	6.85821	8.73081	7.60685	455.48	FALSE	FALSE	['Sn2Bi2O7', 'Bi', 'SnO2', 'Ag']		AgSnBiO3	28.94	468.25	-111.43	5.81	23.7	383.13	123.64	5.86	0.4153	0.3083
m-369	NaPbNO3	Pmn2_1	1.971	0.364744	2.47307	2.5e+20	1300	0.687203	1e+21	1300	36.39	7.5e+20	1300	9.3529	1e+21	400	[]	7.39791	7.5849	6.93626	389.21	FALSE	FALSE	['Na2PbO2', 'NaNO3', 'NaN3', 'PbO']		NaPbNO3	1.07	17.4	-147.77	0.38	12.82	209.13	271.02	15.36	1.2656	4.1918
m-373	NaSiAsS3	Pmn2_1	0.9938	0.368296	1.83033	1e+20	1300	1.18003	5e+20	1300	40.92	5e+20	1300	19.4779	5e+21	1300	[]	6.85336	9.30594	10.2967	656.69	FALSE	FALSE	['As', 'Na2Si2S5', 'AsS']		NaSiAsS3	58.06	938.36	-102.03	9.77	1.26	20.55	206.86	0.88	0.5917	1.9039
m-404	KSiPS3	Pmn2_1	1.4343	0.372849	2.25386	7.5e+19	1300	1.3813	7.5e+20	1300	60.18	5e+20	1300	34.3161	5e+21	800	[]	6.71595	9.62199	11.3087	730.779	FALSE	FALSE	['SiS2', 'SiP2', 'P', 'K3PS4']		KSiPS3	80.4	1298.7	-102.39	13.62	0.4	6.55	211.18	0.29	0.5217	14.2483
m-583	AgGeBiO3	Pmn2_1	0	0.374207	0.330667	5e+20	1300	0.352307	2.5e+20	900	20.23	7.5e+20	1300	14.4162	5e+20	1300	[]	6.66156	8.73337	7.15757	416.412	FALSE	TRUE	['GeO2', 'Bi', 'Ge3(BiO3)4', 'Ag']		AgGeBiO3	8.69	141.51	-225.42	7.19	47.03	760.37	113.33	9.77	0.7475	0.4094
m-326	NaSiPS3	Pmn2_1	1.2737	0.377803	2.07829	1e+20	1300	1.36351	2.5e+20	1300	54.62	5e+20	1300	28.0822	7.5e+21	550	[]	6.68442	9.13352	10.3066	629.241	FALSE	FALSE	['Na2Si2S5', 'P4S3', 'P']		NaSiPS3	66.79	1080.58	-68.94	5.14	1.47	23.95	210.22	1.06	0.4637	1.8517
m-529	CuPPbO3	Pmn2_1	1.7911	0.379908	2.8255	5e+20	1300	2.28916	7.5e+20	1300	37.91	1e+21	1300	31.0678	1e+21	1050	[]	7.61053	7.74776	6.63689	391.341	TRUE	FALSE	['Cu', 'P2Pb3O8', 'P2Pb2O7', 'CuP2']		CuPPbO3	0.78	12.7	-170.68	0.37	11.93	194.26	257.77	12.91	0.9602	1.8426
m-471	CuSnTe3N	Pmn2_1	0.1048	0.384872	0.52605	1e+21	350	0.552054	1e+21	400	29.16	1e+21	400	34.8729	1e+22	850	[]	8.37526	8.87431	9.1618	680.947	FALSE	FALSE	['Te', 'N2', 'Cu2SnTe3', 'SnTe']		CuSnTe3N	0	0	0	0	0	0	0	0	0	0
m-558	AgPPbO3	Pmn2_1	0.9727	0.387214	2.22989	5e+20	1300	1.4453	1e+20	1300	31.1	7.5e+20	1000	40.953	5e+20	1300	[]	7.50274	8.83207	6.37523	422.453	FALSE	FALSE	['Ag3P11', 'Ag', 'Pb', 'P2Pb2O7']		AgPPbO3	18.24	296.44	-185.63	10.21	33.22	539.21	167.92	15.2	1.1628	1.0625
m-619	CuTe3PbN	Pmn2_1	0.2431	0.387481	0.759946	1e+21	500	0.84417	1e+21	500	30.24	1e+22	1150	31.8042	1e+22	950	[]	8.50296	8.99053	9.14665	699.226	TRUE	FALSE	['Te', 'TePb', 'CuTe', 'N2']		CuTe3PbN	0	0	0	0	0	0	0	0	0	0
m-483	CuPbSe3N	Pmn2_1	0.5207	0.388081	1.30456	2.5e+20	900	1.24082	5e+20	850	29.33	5e+20	1050	23.2309	7.5e+20	850	[]	7.95598	8.37032	8.7729	584.224	FALSE	TRUE	['PbSe', 'CuSe2', 'N2']		CuPbSe3N	3.93	63.89	-131.37	1.1	4.75	77.25	133.74	1.38	0.7944	0.7751
m-543	AgSnS3N	Pmn2_1	0.3968	0.398683	0.946857	2.5e+20	950	0.839708	5e+20	900	32.42	5e+20	1300	17.5924	7.5e+20	950	[]	6.88064	8.651	9.43822	561.804	FALSE	FALSE	['N2', 'Ag8SnS6', 'S2N', 'SnS2']		AgSnS3N	19.35	313.69	-152.11	7.26	0.16	2.64	192.01	0.1	0.9769	1.9286
m-435	KPbNO3	Pmn2_1	1.9716	0.405193	1.09087	5e+20	1300	0.440927	1e+21	1300	11.63	1e+21	1300	6.7604	7.5e+21	250	[]	7.08214	8.56482	9.2085	558.562	FALSE	FALSE	['KNO2', 'PbO']		KPbNO3	N/A	N/A	N/A	N/A	N/A	N/A	N/A	N/A	28.8731	6.6166
m-343	NaPbS3N	Pmn2_1	1.0151	0.410499	1.34981	2.5e+20	1300	0.534967	5e+20	1250	14.9	5e+20	1300	8.7583	7.5e+21	400	[]	9.33366	8.17075	8.3473	636.59	TRUE	FALSE	['NaS2', 'N2', 'PbS']		NaPbS3N	5.04	81.86	-178.4	2.61	0.07	1.07	174.34	0.03	1.3398	1.9962
m-476	CuSnS3N	Pmn2_1	0.4498	0.415539	1.22079	2.5e+20	900	1.02853	5e+20	900	35.98	7.5e+20	1300	20.9747	7.5e+20	950	[]	7.34742	7.88833	8.40853	487.349	FALSE	TRUE	['N2', 'CuS', 'SnS2']		CuSnS3N	48.08	779.81	-157.67	19.39	3.84	62.54	208.47	2.72	0.7286	1.2966
m-552	AgPbSe3N	Pmn2_1	0.3978	0.416286	1.10025	2.5e+20	950	1.21464	7.5e+20	950	27.95	5e+20	1150	23.7765	1e+21	950	[]	8.13368	8.70791	9.07271	642.596	FALSE	FALSE	['PbSe', 'Ag2Se', 'Se', 'N2']		AgPbSe3N	41.19	668.59	-163.22	17.81	18.97	308.29	191.49	11.3	0.6042	0.8853
m-551	AgTe3PbN	Pmn2_1	0.0637	0.417171	0.388147	2.5e+20	500	0.497216	7.5e+20	650	17.51	5e+20	700	17.108	1e+21	750	[]	8.75665	9.31435	9.4157	767.969	FALSE	TRUE	['Ag2Te', 'TePb', 'Te', 'N2']		AgTe3PbN	22.88	372.03	-192.27	13.75	11.14	180.78	175.05	5.54	0.2396	0.551
m-630	AgSnPO3	Pmn2_1	0.4098	0.417289	1.25813	1e+21	800	1.02912	1e+21	850	38.33	1e+22	1300	36.9984	1e+21	950	[]	6.74448	8.85127	6.40752	382.511	FALSE	FALSE	['Ag', 'Sn2P2O7', 'Sn3(PO4)2', 'Ag3SnP7']		AgSnPO3	0	0	0	0	0	0	0	0	0	0
m-549	AgSnTe3N	Pmn2_1	0	0.417419	0.132572	1e+22	1300	0.187359	2.5e+21	950	15.54	1e+22	600	10.9598	2.5e+21	900	[]	8.14791	9.4318	9.6007	737.809	TRUE	FALSE	['Ag2Te', 'SnTe', 'N2', 'Te']		AgSnTe3N	2.3	37.4	-189.54	1.34	2.73	44.33	186.48	1.54	0.9624	0.5849
m-626	KPbS3N	Pmn2_1	0.5285	0.417685	0.206052	1e+16	1300	0.297729	1e+22	1300	4.03	1e+21	100	6.2705	1e+21	300	[]	8.85182	9.56794	9.22612	781.395	FALSE	FALSE	['K2S3', 'N2', 'PbS', 'K2S5']		KPbS3N	0	0	0	0	0	0	0	0	4.7581	2.1855
m-351	NaGePO3	Pmn2_1	1.8175	0.423199	2.13549	2.5e+20	1300	1.76706	5e+20	1300	43.79	1e+21	1300	22.144	1e+21	1300	[]	6.074	7.75824	8.35677	393.8	FALSE	FALSE	['Ge', 'NaPO3']		NaGePO3	31.67	513.73	-183.59	17.32	2.34	38.08	245.76	2.3	0.8658	1.5105
m-539	AgGePO3	Pmn2_1	1.2925	0.424568	2.36718	5e+20	1300	1.60206	5e+20	1300	30.84	1e+21	1300	17.191	7.5e+20	1100	[]	5.9139	7.80156	8.57509	395.635	FALSE	FALSE	['GeP2O7', 'Ag', 'Ag3Ge5P6', 'Ge']		AgGePO3	14.41	233.23	-132.79	4.11	7.52	122.45	214.74	5.65	0.5744	1.4787
m-478	CuSnSe3N	Pmn2_1	0.3515	0.425792	0.976995	2.5e+20	800	1.19848	5e+20	750	30.54	5e+20	1000	28.2035	7.5e+20	750	[]	7.77687	8.33347	8.71243	564.638	TRUE	FALSE	['Cu2SnSe3', 'N2', 'SnSe2', 'Se']		CuSnSe3N	9.21	149.35	-107.09	1.71	8.1	131.68	109.05	1.57	0.6017	0.7312
m-502	CuGePO3	Pmn2_1	1.6987	0.427329	1.9806	2.5e+20	1300	1.52462	2.5e+21	1300	36.61	1e+21	1300	16.3343	2.5e+21	1000	[]	5.86341	7.22398	8.02499	339.916	FALSE	TRUE	['Ge', 'GeP2O7', 'CuP2', 'Cu3Ge']		CuGePO3	26.78	435.42	-212.87	19.73	0.3	4.85	241.22	0.28	1.4925	-1.679
m-553	AgGeS3N	Pmn2_1	0.1735	0.440289	0.421587	2.5e+20	800	0.634899	1e+21	1100	33.41	1e+22	1300	23.6364	1e+21	1050	[]	6.38993	8.69162	9.66292	536.668	FALSE	TRUE	['Ag2GeS3', 'N2', 'GeS2', 'S2N']		AgGeS3N	0	0	0	0	0	0	0	0	0	0
m-598	CuGeTe3N	Pmn2_1	0	0.4434	0.0450167	1e+16	600	0.0506388	1e+21	550	13.26	1e+22	800	26.5675	1e+22	600	[]	7.1861	8.92004	9.83789	630.612	FALSE	FALSE	['Te', 'Cu2GeTe3', 'Ge3N4', 'CuTe']		CuGeTe3N	0	0	0	0	0	0	0	0	0	0
m-547	AgSnSe3N	Pmn2_1	0	0.44605	0.280064	1e+22	1300	0.176634	2.5e+21	1050	34.77	1e+22	1150	7.0664	5e+21	1300	[]	7.29613	8.96083	9.67276	632.399	FALSE	FALSE	['Ag8SnSe6', 'N2', 'SnSe2', 'Se']		AgSnSe3N	149.44	2416.42	-123.19	36.67	6.1	99.19	196.95	3.85	0.4903	0.7518
m-479	CuSnPO3	Pmn2_1	1.4466	0.446556	1.90805	2.5e+20	1300	1.70859	1e+21	1300	34.28	1e+21	1300	20.1153	1e+21	500	[]	6.48647	7.26116	7.65905	360.736	FALSE	FALSE	['Sn3(PO4)2', 'Cu', 'Cu4SnP10', 'Sn2P2O7']		CuSnPO3	8.86	144.11	-198.01	5.65	0.02	0.26	216.59	0.01	1.0976	6.772
m-554	AgGeTe3N	Pmn2_1	0	0.447492	N/A	N/A	N/A	N/A	N/A	N/A	N/A	N/A	N/A	0	N/A	N/A	[]	7.20138	9.58989	10.4586	722.275	FALSE	FALSE	['Ag2Te', 'GeTe', 'Ge3N4', 'Te']		AgGeTe3N	213.03	3459.4	-179.55	111.52	515.68	8356.22	130.08	141.39	0.3434	0.212
m-364	NaSiBiO3	Pmn2_1	0	0.448909	0.421386	7.5e+20	1300	0.385175	1e+16	1300	44.18	1e+22	550	29.6036	7.5e+20	1300	[]	7.32478	8.87489	6.80244	442.204	FALSE	TRUE	['Bi', 'Si3(BiO3)4', 'Na2Si2O5', 'Na2SiO3']		NaSiBiO3	45.73	740.76	-138.13	14.13	32.84	532.76	166.05	14.69	0.5505	0.8744
m-350	NaPbSe3N	Pmn2_1	0.9322	0.450797	1.71939	5e+20	1300	1.43146	5e+20	1200	23.82	7.5e+20	1300	19.3871	7.5e+20	800	[]	10.763	8.35063	8.43664	758.266	FALSE	TRUE	['PbSe', 'NaSe2', 'N2']		NaPbSe3N	4.34	70.68	-196.28	2.72	11.31	183.89	177.27	5.78	1.8292	0.8961
m-494	CuGeS3N	Pmn2_1	0.1271	0.45754	0.477515	2.5e+20	700	0.467521	7.5e+20	950	36.49	1e+21	1300	19.1335	1e+21	1000	[]	6.59705	7.9169	8.9684	468.403	FALSE	FALSE	['CuS2', 'N2', 'Cu2GeS3', 'GeS2']		CuGeS3N	110.05	1782.68	-146.1	38.05	56.57	917.24	167.33	25.68	0.5597	0.8529
m-481	CuGeSe3N	Pmn2_1	0	0.464546	0.0913921	1e+22	1300	0.166321	5e+21	1300	19.26	1e+22	1300	17.4626	1e+22	1300	[]	6.99406	8.35086	9.13767	533.699	FALSE	FALSE	['Se', 'GeSe2', 'Cu2GeSe3', 'N2']		CuGeSe3N	11.62	188.34	-172.98	5.64	4.09	66.33	169.97	1.92	0.4334	0.3235
m-412	KGePO3	Pmn2_1	2.1854	0.464811	1.89654	2.5e+20	1300	1.3191	7.5e+20	1300	40.77	1e+21	1300	12.918	1e+21	1300	[]	6.02934	8.44465	9.46182	481.755	FALSE	FALSE	['KPO3', 'Ge']		KGePO3	2752.75	44666.8	-626.01	17504.4	0.01	0.15	220.37	0.01	0.9037	4.5635
m-540	SiAgPO3	Pmn2_1	2.3355	0.46747	3.085	2.5e+20	1300	2.27118	5e+20	1300	63.65	1e+21	1300	39.74	1e+21	1300	[]	5.30817	7.49759	9.57756	381.173	TRUE	FALSE	['Si5P6O25', 'Ag', 'Ag3P11', 'SiO2']		SiAgPO3	0.36	5.83	-200.48	0.23	1.22	19.83	214.28	0.91	2.9045	1.7242
m-432	KPbSe3N	Pmn2_1	0.848	0.468724	1.38021	1e+21	1150	0.535716	1e+22	1300	17.08	1e+21	700	7.4918	1e+22	1300	[]	11.4774	9.30602	8.68672	927.82	FALSE	TRUE	['K2Se5', 'PbSe', 'N2', 'K2Se3']		KPbSe3N	0	0	0	0	0	0	0	0	0	0
m-550	AgGeSe3N	Pmn2_1	0	0.476309	0.401255	1e+22	1300	0.327822	5e+21	1300	49.06	1e+22	1300	25.0536	7.5e+21	1300	[]	6.74902	9.04567	9.95399	607.685	FALSE	FALSE	['Se', 'Ag8GeSe6', 'GeSe2', 'N2']		AgGeSe3N	185.99	3006.4	-105.9	33.72	17.63	286.92	160.84	7.42	0.4011	0.7128
m-422	KTe3PbN	Pmn2_1	0	0.478592	0.279336	1e+21	1000	0.180211	1e+21	550	14.65	1e+21	1050	7.9699	7.5e+20	450	[]	9.94936	9.5661	8.19164	779.652	FALSE	FALSE	['TePb', 'Te', 'K2Te3', 'N2']		KTe3PbN	14.46	234.14	-135.82	4.32	8.55	138.79	158.29	3.48	0.3058	0.7455
m-627	NaTe3PbN	Pmn2_1	0	0.481903	0.294742	1e+21	800	0.269439	1e+16	750	18.33	1e+21	900	17.7634	1e+16	800	[]	9.12903	8.83835	9.58328	773.232	TRUE	FALSE	['NaN3', 'TePb', 'NaTe3']		NaTe3PbN	113.27	1836.42	-99.96	18.35	0.46	7.57	-216.08	0.35	0.4866	4.3779
m-612	SiAgSbO3	Pnma	1.7576	0.488894	3.76808	1e+21	1300	3.84071	1e+21	1300	156.17	1e+22	1300	149.863	1e+22	1300	[]	5.72717	8.02052	9.33929	429	FALSE	FALSE	['SiO2', 'Sb2O3', 'Sb', 'Ag']		N/A
m-537	SiCuBiO3	Pmn2_1	0.352	0.493717	0.758259	1e+20	1200	0.838606	2.5e+20	1200	18.83	2.5e+20	1300	29.4304	5e+20	1300	[]	7.31811	8.47823	6.59809	409.376	FALSE	TRUE	['SiO2', 'Si3(BiO3)4', 'Bi', 'Cu']		SiCuBiO3	1.97	32.06	-150.94	0.73	1.72	27.92	154.08	0.66	0.86	1.4299
m-438	KSiBiO3	Pmn2_1	0.0546	0.495473	0.480672	7.5e+21	800	0.26944	1e+22	1300	21.84	7.5e+21	750	8.877	1e+22	1050	[]	7.51316	9.79689	6.45881	475.404	FALSE	TRUE	['K2SiO3', 'K2Si2O5', 'Bi', 'Si3(BiO3)4']		KSiBiO3	12.63	205.63	-1015.74	212.15	59.94	971.6	157	23.95	0.9399	0.8133
m-592	SiAgAsO3	Pmn2_1	2.0614	0.495502	3.68588	1e+21	1300	3.52092	1e+21	1300	125.82	1e+22	1300	106.909	1e+22	1300	[]	5.50762	7.82573	9.4434	407.022	FALSE	TRUE	['As2O3', 'As', 'SiO2', 'Ag']		SiAgAsO3	2.49	40.46	-143.67	0.84	1.77	28.82	162.15	0.76	1.9572	1.6914
m-341	NaSnS3N	Pmn2_1	0.2849	0.506501	0.603114	2.5e+20	900	0.580707	5e+20	750	14.22	5e+20	1100	11.1422	5e+20	650	[]	7.87171	8.59603	8.87146	600.291	TRUE	FALSE	['Na4Sn3S8', 'N2', 'Na2S5', 'SnS2']		NaSnS3N	20.9	340.05	-192.6	12.61	6.46	105.26	190.75	3.83	2.2702	1.2698
m-414	KSnS3N	Pmn2_1	0.3075	0.51088	0.298521	1e+22	1300	0.51077	5e+20	700	4.76	1e+16	900	10.87	5e+20	450	[]	9.22859	9.66704	8.90241	794.212	FALSE	FALSE	['K2Sn2S5', 'N2', 'KSnS4']		KSnS3N	N/A	N/A	N/A	N/A	N/A	N/A	N/A	N/A	3.0932	10.7067
m-531	CuSnNO3	Pmn2_1	0.4779	0.513709	0.330151	1e+16	1300	0.895306	2.5e+20	850	14.27	1e+16	1300	25.9801	5e+20	1050	[]	5.34858	10.6536	8.74028	498.034	FALSE	FALSE	['SnO2', 'CuO', 'N2']		CuSnNO3	0.14	2.36	-211.84	0.11	51.74	838.87	154.83	20.11	6.2741	1.5485
m-344	NaSnTe3N	Pmn2_1	0	0.520119	0.928238	1e+22	750	0.259887	5e+21	1150	22.03	7.5e+21	1300	18.7379	7.5e+21	1300	[]	7.91026	9.75013	10.1215	780.633	FALSE	FALSE	['NaTe3', 'NaN3', 'SnTe']		NaSnTe3N	149.03	2410.23	-122.75	36.32	12.54	203.97	180.26	6.63	0.7775	0.0001
m-411	KSnTe3N	Pmn2_1	0	0.527548	0.0450379	1e+16	1050	0.123645	1e+22	650	11.1	1e+16	900	29.3009	1e+22	650	[]	7.20731	10.3725	11.1222	831.472	TRUE	FALSE	['SnTe', 'K2SnTe5', 'N2']		KSnTe3N	8.05	131.15	-318.42	13.3	3.8	61.44	113.09	0.79	0.225	0.1102
m-578	SiAgBiO3	Pmn2_1	0.7695	0.540067	1.90546	5e+20	1300	1.02607	1e+20	1100	47.05	1e+21	1300	21.6827	2.5e+20	1300	[]	6.52976	9.16198	6.61151	395.537	FALSE	FALSE	['Ag', 'Bi', 'Si3(BiO3)4', 'SiO2']		SiAgBiO3	43.56	708.26	-310.77	68.4	830.81	13483.6	392.56	2077.86	0.9647	0.9955
m-338	NaSnSe3N	Pmn2_1	0.2414	0.541962	0.596072	2.5e+20	850	0.49532	5e+20	650	20.12	5e+20	1100	11.4374	5e+20	550	[]	8.02879	9.08009	9.30931	678.669	FALSE	FALSE	['Na2SnSe3', 'N2', 'Se', 'SnSe2']		NaSnSe3N	107.46	1739.67	-158.25	43.57	0.63	10.3	208.01	0.45	0.8295	2.9543
m-342	NaGeTe3N	Pmn2_1	0	0.545269	0.0884343	1e+16	450	0.100984	1e+21	450	43.86	1e+16	450	48.8733	1e+21	450	[]	7.24984	10.0759	10.9401	799.157	FALSE	TRUE	['NaTe3', 'GeTe', 'Ge3N4', 'Na4Ge2Te5']		NaGeTe3N	5.01	81.18	-130.53	1.38	0.53	8.58	155.66	0.21	0.1988	0.1005
m-348	NaGeS3N	Pmn2_1	0.5677	0.551449	1.15058	2.5e+20	1100	1.53454	5e+20	1000	54.49	7.5e+20	1300	38.5019	1e+21	1100	[]	6.47263	9.01028	9.99099	582.677	FALSE	TRUE	['GeS2', 'N2', 'Na2S5', 'Na2Ge2S5']		NaGeS3N	15.69	253.95	-122.09	3.79	2.04	33.31	221.75	1.64	0.6646	2.4533
m-416	KSnSe3N	Pmn2_1	0.2762	0.551487	N/A	N/A	N/A	N/A	N/A	N/A	N/A	N/A	N/A	0.0028	N/A	N/A	[]	7.20403	9.18149	11.5281	762.515	FALSE	FALSE	['K2Sn2Se5', 'Se', 'N2']		KSnSe3N	128.93	2083.94	-128.22	34.26	0	0.08	187.29	0	0.5217	0.0002
m-588	AgGeNO3	Pmn2_1	1.5894	0.561632	0.53712	1e+21	1300	1.22117	1e+21	1300	7.38	1e+22	650	12.5528	1e+21	750	[]	6.47111	9.64392	7.75755	484.124	FALSE	FALSE	['AgNO3', 'GeO2', 'Ag', 'N2']		AgGeNO3	86.55	1411.41	-271.86	104.31	822.63	13407	321.58	1386.46	4.3258	1.4928
m-346	NaGeSe3N	Pmn2_1	0	0.563955	0.607553	1e+22	1300	0.279603	2.5e+21	1000	51.51	1e+22	1300	15.9891	1e+22	950	[]	6.81449	9.47202	10.4053	671.632	FALSE	FALSE	['Se', 'Na2Ge2Se5', 'N2']		NaGeSe3N	3.29	53.13	-63.23	0.21	16.78	271.34	130.14	4.6	0.4112	0.9864
m-567	AgSnNO3	Pmn2_1	1.0062	0.564539	1.1679	5e+20	1300	1.04863	7.5e+20	1300	13.36	7.5e+20	850	11.2961	7.5e+20	800	[]	6.48327	10.0014	7.88435	511.237	TRUE	FALSE	['N2', 'Ag', 'AgNO3', 'SnO2']		AgSnNO3	57.44	936.73	-343.46	110.5	7.93	128.55	128.94	2.14	2.818	1.7291
m-420	KGeTe3N	Pmn2_1	0	0.569227	0.0741802	1e+22	550	0.132046	1e+22	950	17.71	1e+22	600	39.1332	1e+22	750	[]	7.02234	10.9501	10.9126	839.121	FALSE	FALSE	['K2Te3', 'Te', 'K2GeTe4', 'Ge3N4']		KGeTe3N	4.46	72.46	-89.72	0.58	5	81.19	162.4	2.14	0.0824	0.3119
m-391	NaGeNO3	Pmn2_1	1.9257	0.574628	0.0974321	1e+22	500	1.57075	5e+20	1300	3.27	1e+22	200	18.4631	7.5e+20	850	[]	7.31949	6.62214	9.65409	467.94	FALSE	FALSE	['Na2GeO3', 'N2', 'Na4Ge9O20', 'NaNO3']		NaGeNO3	N/A	N/A	N/A	N/A	N/A	N/A	N/A	N/A	11.193	3.3489
m-424	KGeSe3N	Pmn2_1	0	0.61313	1.08893	1e+22	1300	0.310408	2.5e+21	1250	58.47	1e+22	1300	14.6965	1e+22	1300	[]	6.8342	9.98515	10.5161	717.624	FALSE	FALSE	['Se', 'K2Ge2Se5', 'N2']		KGeSe3N	13.6	219.82	-203.07	9.06	1.43	23.19	85.04	0.17	0.4442	0.2532
m-609	SiCuPO3	Pmn2_1	0.471	0.627899	1.19896	1e+21	1100	0.964466	1e+21	850	61.71	1e+21	1300	25.3501	1e+16	1300	[]	5.32263	7.13057	9.04559	343.311	FALSE	FALSE	['Si5P6O25', 'SiO2', 'Cu', 'CuP2']		SiCuPO3	147.72	2387.09	-103.86	25.75	10.49	170.57	203.35	7.05	0.5703	0.7774
m-538	CuGeNO3	Pmn2_1	0.2785	0.630159	0.834554	5e+20	950	0.73634	1e+16	1200	19.03	7.5e+20	650	14.9968	1e+16	1150	[]	5.43998	8.69341	9.46063	447.412	FALSE	TRUE	['N2', 'CuO', 'GeO2']		CuGeNO3	71.41	1163.55	-317.9	117.59	23.14	375.55	208.82	16.38	2.5428	2.7752
m-429	KGeS3N	Pmn2_1	0.0418	0.635039	0.171423	1e+16	1300	0.284638	1e+22	1200	21.43	1e+16	1300	26.7741	1e+22	1250	[]	6.44366	9.71157	10.7346	671.75	FALSE	FALSE	['K2Ge2S5', 'K2S5', 'N2', 'GeS2']		KGeS3N	101.5	1642.3	-142.71	33.45	718.18	11701.3	185.03	400.61	0.7436	2.1007
m-421	KSnNO3	Pmn2_1	1.8393	0.637722	1.05513	5e+20	1300	0.820363	7.5e+20	1300	10.23	5e+20	1050	8.387	7.5e+20	700	[]	7.01307	8.44355	9.12963	540.614	FALSE	TRUE	['N2', 'SnO2', 'K2SnO3', 'KNO3']		KSnNO3	N/A	N/A	N/A	N/A	N/A	N/A	N/A	N/A	5.5345	7.5296
m-600	NaSiPO3	Pmn2_1	1.5139	0.645554	2.36422	1e+21	1300	2.64551	1e+21	1300	72.81	1e+22	1300	71.8262	1e+22	1300	[]	5.53706	6.52648	9.9026	357.855	FALSE	FALSE	['SiO2', 'P', 'Na4P2O7', 'Na2Si2O5']		NaSiPO3	0	0	0	0	0	0	0	0	0	0
m-321	NaSiSbO3	Pmn2_1	0.308	0.649856	0.778267	5e+20	1250	0.822914	7.5e+20	950	48.14	2.5e+21	1300	16.4909	7.5e+20	950	[]	5.86542	8.10125	8.66377	411.678	FALSE	FALSE	['Na2Si2O5', 'Sb', 'Na2Sb4O7', 'SiO2']		NaSiSbO3	74.21	1202.27	-143.26	24.67	25.55	414.52	190.86	15.1	0.5738	0.398
m-395	KSiSbO3	Pmn2_1	1.0594	0.65064	1.73585	2.5e+20	1300	1.22224	5e+20	1300	32.53	1e+21	1300	13.2778	5e+20	850	[]	5.9732	7.34688	11.5878	508.522	FALSE	TRUE	['KSb3O5', 'Sb', 'K2Si2O5', 'K2Si4O9']		KSiSbO3	22.83	370.33	-165.54	10.15	13.83	224.76	164.16	6.06	1.0522	0.9375
m-541	SiAgS3N	Pmn2_1	0	0.664014	0.279239	2.5e+20	550	0.333128	7.5e+20	700	34.72	1e+21	1300	22.8688	1e+21	800	[]	6.17969	8.79799	9.67365	525.945	TRUE	FALSE	['SiS2', 'S2N', 'Si3N4', 'Si(Ag4S3)2']		SiAgS3N	35.12	568.26	-130.78	9.72	4.47	72.69	224.39	3.66	0.4405	0.8838
m-357	NaSnNO3	Pmn2_1	1.8725	0.674111	0.71631	2.5e+21	1300	1.01471	7.5e+20	1300	13.51	7.5e+21	1300	12.9095	1e+22	450	[]	6.83864	7.96687	8.15874	444.509	TRUE	FALSE	['NaNO3', 'N2', 'Na2SnO3', 'SnO2']		NaSnNO3	2.01	32.79	-246.33	1.99	13.98	227.8	295.37	19.87	3.4694	1.6997
m-415	KSiPO3	Pmn2_1	2.2497	0.687667	1.64693	2.5e+20	1300	1.04399	1e+21	1300	33.06	7.5e+20	1300	10.6674	1e+21	550	[]	5.67868	7.99066	10.2339	464.376	FALSE	TRUE	['K3PO4', 'K2Si4O9', 'SiO2', 'K3P11']		KSiPO3	7.55	122.81	-197.73	4.8	0.18	2.91	202.53	0.12	1.5913	3.2816
m-382	NaSiAsO3	Pmn2_1	1.3448	0.699059	1.88356	2.5e+20	1300	1.25172	5e+20	1300	37.45	1e+21	1300	13.5601	5e+20	850	[]	5.70526	7.15795	9.8061	400.461	FALSE	FALSE	['SiO2', 'As', 'NaAsO2', 'Na2Si2O5']		NaSiAsO3	17.63	286.32	-168.89	8.17	8.46	137.58	234.64	7.57	1.0799	1.0267
m-629	SiCuAsO3	Pmn2_1	0.8532	0.70378	2.67777	1e+21	1200	1.98544	1e+21	1050	69.53	1e+22	1300	35.8825	1e+22	1300	[]	5.54137	6.7654	9.49873	356.104	FALSE	FALSE	['SiO2', 'As', 'As2O3', 'Cu']		SiCuAsO3	0	0	0	0	0	0	0	0	0	0
m-449	KSiAsO3	Pmn2_1	1.4041	0.724853	1.62139	2.5e+20	1300	0.81902	5e+20	1300	33.38	7.5e+20	1300	9.2541	5e+20	600	[]	5.78219	7.7743	10.9861	493.855	TRUE	FALSE	['As', 'KAsO2', 'K2Si2O5', 'K2Si4O9']		KSiAsO3	N/A	N/A	N/A	N/A	N/A	N/A	N/A	N/A	1.1144	2.0113
m-480	SiCuS3N	Pmn2_1	0	0.765486	0.194778	1e+21	1300	0.172928	1e+21	700	38.32	1e+21	1300	18.2851	1e+16	1300	[]	6.26309	7.9965	8.90111	445.792	FALSE	FALSE	['SiS2', 'S2N', 'CuS2', 'Si3N4']		SiCuS3N	48.28	781.33	-111.02	9.63	0.08	1.25	200.71	0.05	0.4228	10.2177
m-466	SiCuSbO3	Pmn2_1	0.3346	0.789572	0.882849	5e+20	1050	1.12463	1e+21	1200	46.03	1e+21	1300	25.6443	1e+21	1150	[]	5.89863	7.35528	8.20372	355.927	FALSE	FALSE	['Cu', 'Sb2O3', 'Sb', 'SiO2']		SiCuSbO3	26.16	422.4	-86.4	3.15	0.46	7.45	257.15	0.49	0.0697	3.3528
m-457	KGeNO3	Pmn2_1	1.0421	0.826056	1.73925	5e+20	1300	1.23891	1e+21	1300	30.3	1e+21	1100	41.1139	1e+22	1300	[]	6.23272	10.5785	8.39047	553.207	FALSE	FALSE	['K2Ge2O5', 'KNO3', 'N2', 'K4Ge9O20']		KGeNO3	N/A	N/A	N/A	N/A	N/A	N/A	N/A	N/A	2.4179	3.7719
m-546	SiAgTe3N	Pmn2_1	0	0.82876	0.299413	1e+22	1300	0.142479	5e+21	900	49.5	1e+22	1300	19.1378	7.5e+20	500	[]	7.1415	9.79909	9.82837	687.791	FALSE	FALSE	['Ag2Te', 'Te', 'Si', 'Si3N4']		SiAgTe3N	63.17	1027.65	-122.25	15.36	111.88	1810.36	111.36	22.45	0.5993	0.1959
m-475	SiCuTe3N	Pmn2_1	0	0.832359	0.155178	1e+22	1300	0.13853	7.5e+21	1300	35.8	1e+22	1300	19.3282	7.5e+21	1300	[]	7.13467	8.9874	9.79754	628.24	FALSE	FALSE	['SiCu2Te3', 'Te', 'CuTe', 'Si3N4']		SiCuTe3N	241.99	3927.2	-128.05	64.39	253	4101.15	156.38	100.29	0.5161	0.1445
m-474	SiCuSe3N	Pmn2_1	0	0.837865	0.0741091	1e+22	1300	0.166578	7.5e+21	1300	21.62	2.5e+21	1050	22.3898	1e+22	1200	[]	6.67664	8.39326	9.27973	520.025	FALSE	FALSE	['CuSe2', 'SiSe2', 'Se', 'Si3N4']		SiCuSe3N	6.55	106.41	-212.19	4.79	2	32.36	179.72	1.05	0.4976	0.9568
m-542	SiAgSe3N	Pmn2_1	0	0.838679	0.302393	1e+22	1300	0.171675	5e+21	1300	40.37	1e+22	1300	21.2532	1e+22	1150	[]	6.53095	9.17561	9.92151	594.551	FALSE	FALSE	['Ag2Se', 'Si3N4', 'SiSe2', 'Se']		SiAgSe3N	49.77	804.68	-113.15	10.3	7.3	118.8	189.63	4.27	0.4857	0.6249
m-339	NaSiS3N	Pmn2_1	0.1872	0.856801	0.608453	2.5e+20	750	0.691445	7.5e+20	750	55.65	1e+21	1300	35.7279	1e+21	900	[]	6.24701	9.01203	10.0387	565.161	FALSE	FALSE	['Si3N4', 'SiS2', 'Na2S5']		NaSiS3N	52	840.71	-121.78	12.47	0.08	1.31	211.21	0.06	0.4937	-0.0018
m-410	KSiS3N	Pmn2_1	0	0.862825	0.0932902	1e+22	450	0.0587135	1e+16	600	21.06	1e+22	50	12.1271	1e+22	50	[]	6.21327	9.68959	11.3587	683.839	FALSE	TRUE	['SiS2', 'Si3N4', 'K2S5']		KSiS3N	38.56	623.36	-1247.2	969.64	1.12	18.24	102.25	0.19	0.3594	1.4464
m-418	KSiTe3N	Pmn2_1	0	0.863654	0.116154	7.5e+21	950	0.0856366	2.5e+21	850	13.59	7.5e+21	800	11.0607	2.5e+21	550	[]	6.88102	11.0685	9.09267	692.519	FALSE	FALSE	['K3SiTe3', 'K2Te3', 'Te', 'Si3N4']		KSiTe3N	7.42	120.29	-147.76	2.63	9.24	149.7	124.29	2.31	0.1035	0.2287
m-408	KSiSe3N	Pmn2_1	0.0687	0.902089	0.462623	1e+22	500	0.238672	5e+21	400	31.53	5e+20	450	21.3431	5e+20	300	[]	6.33532	9.99349	11.0193	697.652	FALSE	FALSE	['Si3N4', 'K2Se5', 'SiSe2']		KSiSe3N	N/A	N/A	N/A	N/A	N/A	N/A	N/A	N/A	0.2848	2.5446
m-336	NaSiSe3N	Pmn2_1	0.0115	0.920558	0.423669	1e+22	1300	0.265229	2.5e+21	1150	46.09	1e+22	1300	58.2564	2.5e+21	100	[]	6.58165	9.50844	10.3894	650.182	FALSE	FALSE	['NaSe2', 'Si3N4', 'Na3SiSe4', 'Se']		NaSiSe3N	0.81	13.14	-208.71	0.57	1.19	19.29	144.12	0.4	0.7566	0.4022
m-312	NaSiTe3N	Pmn2_1	0	0.931469	0.773031	1e+22	1300	0.166043	5e+21	1200	55.31	1e+22	1300	31.8678	2.5e+20	350	[]	7.12234	10.0749	10.3356	741.645	FALSE	FALSE	['Si3N4', 'Te', 'Na4Si2Te5', 'NaTe3']		NaSiTe3N	12.72	205.67	-93.31	1.79	8.2	133.05	195.05	5.06	0.1332	0.2095
m-569	SiAgNO3	Pmn2_1	0.0028	1.03209	0.360272	1e+22	650	0.173	1e+22	750	12.88	2.5e+20	150	10.7951	2.5e+20	200	[]	5.81739	9.89136	6.32435	363.915	FALSE	FALSE	['N2', 'Ag', 'AgNO3', 'SiO2']		SiAgNO3	N/A	N/A	N/A	N/A	N/A	N/A	N/A	N/A	0.1465	0.1674
m-520	SiCuNO3	Pmn2_1	0.9862	1.11327	0.950377	5e+20	1200	1.66428	1e+21	1300	11.19	7.5e+20	850	22.692	1e+21	1000	[]	4.90508	10.0835	7.7651	384.064	FALSE	FALSE	['CuO', 'N2', 'SiO2']		SiCuNO3	N/A	N/A	N/A	N/A	N/A	N/A	N/A	N/A	3.4169	2.326
m-352	NaSiNO3	Pmn2_1	1.5283	1.14937	1.15664	1e+21	1300	1.72249	1e+20	1300	19.26	1e+22	1300	56.6624	1e+21	1300	[]	6.12199	7.25896	10.1072	449.156	FALSE	FALSE	['NaNO3', 'N2', 'Na2Si2O5', 'SiO2']		NaSiNO3	N/A	N/A	N/A	N/A	N/A	N/A	N/A	N/A	3.0454	3.3783
m-419	KSiNO3	Pmn2_1	1.0462	1.16041	1.3977	2.5e+20	1200	0.751187	5e+20	1000	39.75	1e+21	50	33.4311	7.5e+21	700	[]	6.80717	7.9806	10.403	565.146	FALSE	TRUE	['K2Si2O5', 'K2Si4O9', 'N2', 'KNO3']		KSiNO3	1.23	19.93	-103.85	0.21	0.04	0.59	203.26	0.02	2.5944	5.8396
*	Asterisk denotes AMSET results at c=1e20 cm-3 and T=600K and for those with DFT gap of 0 eV the properties are calculated at a scissored gap of 1eV

## Sheet: Coordination Numbers
formula_pretty	A	A symbol	ACN		B	B symbol	BCN		C	C symbol	CCN		D	D symbol	DCN
NaSiNO3	Na	S	5		Si	S	2		N	A	2		O	A	1.67
NaSiS3N	Na	PP	6		Si	TY	3		N	TY	2.33		S	A
NaSiSe3N	Na	PP	6		Si	TY	3		N	TY	2.33		Se	A
NaSiTe3N	Na	TI	9		Si	PP	4		N	TY	2.33		Te	A
NaSiPS3	Na	PP	6		Si	TY	3		P	TY	3		S	TY	3.33
NaSiPSe3	Na	ET	7		Si	TY	3		P	TY	3		Se	TY	3.33
NaSiTe3P	Na	BO_2	8		Si	TY	3		P	TY	3.08		Te	TY
NaSiAsO3	Na	T	6		Si	TY	3		As	TY	3		O	TY	3
NaSiAsS3	Na	PP	6		Si	TY	3		As	TY	3		S	TY	3.33
NaSiAsSe3	Na	PP	6		Si	TY	3		As	TY	3		Se	TY	3.33
NaSiTe3As	Na	BO_2	8		Si	TY	3		As	TY	3.08		Te	TY
NaSiSbO3	Na	FO	7		Si	TY	3		Sb	TY	3		O	A	2.67
NaSiSbS3	Na	PP	6		Si	TY	3		Sb	TY	3		S	TY	3.33
NaSiSbSe3	Na	PP	6		Si	TY	3		Sb	TY	3		Se	TY	3.33
NaSiSbTe3	Na	FO	7		Si	TY	3		Sb	TY	3		Te	TY	3.33
NaSiBiO3	Na	T	4		Si	TY	3		Bi	SS	4		O	A	2.67
NaSiBiS3	Na	PP	6		Si	TY	3		Bi	TY	3		S	TY	3.33
NaSiBiSe3	Na	PP	6		Si	TY	3		Bi	TY	3		Se	TY	3.33
NaSiBiTe3	Na	FO	7		Si	TY	3		Bi	TY	3		Te	TY	3.33
NaGeNO3	Na	S	5		Ge	S	1		N	A	2		O	S	1.67
NaGeS3N	Na	PP	6		Ge	TY	3		N	TY	2.33		S	A
NaGeSe3N	Na	ET	7		Ge	TY	3		N	TY	2.33		Se	A
NaGeTe3N	Na	TI	9		Ge	PP	4		N	TY	2.33		Te	A
NaGePO3	Na	SBT	8		Ge	TY	3		P	TY	3		O	A	2.33
NaGePS3	Na	PP	6		Ge	TY	3		P	TY	3		S	TY	3.33
NaGePSe3	Na	ET	7		Ge	TY	3		P	TY	3		Se	TY	3.33
NaGeTe3P	Na	ET	7		Ge	TY	3		P	TY	3.08		Te	TY
NaGeAsO3	Na	PB	7		Ge	TY	3		As	TY	3		O	TY	3.33
NaGeAsS3	Na	PP	6		Ge	TY	3		As	TY	3		S	TY	3.33
NaGeAsSe3	Na	ET	7		Ge	TY	3		As	TY	3		Se	TY	3.33
NaGeTe3As	Na	FO	7		Ge	TY	3		As	TY	3.08		Te	TY
NaGeSbO3	Na	O	6		Ge	TY	3		Sb	TY	3		O	TY	3.33
NaGeSbS3	Na	T	5		Ge	TY	3		Sb	TY	3		S	TY	3.33
NaGeSbSe3	Na	PP	6		Ge	TY	3		Sb	TY	3		Se	TY	3.33
NaGeSbTe3	Na	FO	7		Ge	TY	3		Sb	TY	3		Te	TY	3.33
NaGeBiO3	Na	T	4		Ge	TY	3		Bi	TY	3		O	TY	3.33
NaGeBiS3	Na	T	5		Ge	TY	3		Bi	TY	3		S	TY	3.33
NaGeBiSe3	Na	PP	6		Ge	TY	3		Bi	TY	3		Se	TY	3.33
NaGeBiTe3	Na	FO	7		Ge	TY	3		Bi	TY	3		Te	TY	3.33
NaSnNO3	Na	T	4		Sn	TY	3		N	TY	2.5		O	S	1.33
NaSnS3N	Na	SA	8		Sn	ST	7.5		N	TY	1.67		S	S
NaSnSe3N	Na	O	6		Sn	ST	7.5		N	TY	1.92		Se	S
NaSnTe3N	Na	SBT	8		Sn	ST	8		N	TY	2.17		Te	S
NaSnPO3	Na	T	5		Sn	SS	3.5		P	TY	3		O	S	1.67
NaSnPS3	Na	T	6		Sn	TY	3		P	TY	3		S	TY	3.33
NaSnPSe3	Na	FO	7		Sn	PP	4		P	TY	3		Se	TY	3.33
NaSnTe3P	Na	FO	7		Sn	PP	4		P	TY	3.08		Te	TY
NaSnAsO3	Na	T	5		Sn	S	4		As	TY	3		O	TY	3.33
NaSnAsS3	Na	T	5		Sn	TY	3		As	TY	3		S	TY	3.33
NaSnAsSe3	Na	T	6		Sn	TY	3		As	TY	3		Se	TY	3.33
NaSnTe3As	Na	FO	7		Sn	PP	4		As	TY	3.08		Te	TY
NaSnSbO3	Na	T	5		Sn	TY	3		Sb	TY	3		O	TY	3.33
NaSnSbS3	Na	T	4		Sn	TY	3		Sb	TY	3		S	TY	3.33
NaSnSbSe3	Na	T	5		Sn	TY	3		Sb	TY	3		Se	TY	3.33
NaSnBiO3	Na	T	5		Sn	S	4		Bi	S	4		O	SS	4.33
NaSnBiS3	Na	T	4		Sn	TY	3		Bi	TY	3		S	TY	3.33
NaSnBiSe3	Na	T	5		Sn	TY	3		Bi	TY	3		Se	TY	3.33
NaSnBiTe3	Na	O	6		Sn	ST	5		Bi	TY	3		Te	TY	4
NaPbNO3	Na	T	5		Pb	PP	7		N	TY	3		O	S	1.5
NaPbS3N	Na	T	5		Pb	SA	9		N	TY	1.67		S	S
NaPbSe3N	Na	T	6		Pb	T	7		N	TY	1.67		Se	S
NaPPbO3	Na	T	5		Pb	PP	6		P	TY	3		O	S	1
NaPPbS3	Na	O	6		Pb	ST	7.5		P	TY	3		S	TY	3
NaPPbSe3	Na	FO	7		Pb	ST	6.5		P	TY	3		Se	TY	3.67
NaTe3PPb	Na	O	6		Pb	ST	4.33		P	TY	Te		TY
NaAsPbO3	Na	T	5		Pb	S	5		As	TY	3		O	A	2.67
NaAsPbS3	Na	S	5		Pb	ST	6.5		As	TY	3		S	TY	3.33
NaAsPbSe3	Na	O	6		Pb	ST	5.5		As	TY	3		Se	TY	3.33
NaTe3AsPb	Na	O	6		Pb	ST	4.33		As	TY	Te		TY
NaSbPbO3	Na	T	5		Pb	S	5		Sb	TY	3		O	TY	3.67
NaSbPbS3	Na	T	4		Pb	S	4		Sb	TY	3		S	TY	3.33
NaSbTe3Pb	Na	O	6		Pb	ST	4.17		Sb	TY	3		Te	TY
NaBiPbO3	Na	T	5		Pb	S	4		Bi	TY	3		O	TY	4
NaBiPbS3	Na	T	4		Pb	S	5.5		Bi	S	4		S	T	4.33
NaBiPbSe3	Na	T	5		Pb	ST	5.5		Bi	TY	3		Se	TY	3.67
NaBiTe3Pb	Na	S	5		Pb	ST	5.17		Bi	S	4		Te	T
KSiNO3	K	SS	4		Si	S	2		N	A	1.5		O	A	1.5
KSiS3N	K	TI	9		Si	TY	3		N	TY	2.08		S	A
KSiSe3N	K	BS_1	10		Si	TY	3		N	TY	2.25		Se	A
KSiTe3N	K	TT	12		Si	S	6		N	A	2.17		Te	A
KSiPO3	K	TO_1	9		Si	TY	3		P	TY	3		O	A	2
KSiPS3	K	TI	9		Si	TY	3		P	TY	3		S	A	2
KSiPSe3	K	TI	9		Si	TY	3		P	TY	3		Se	A	2
KSiTe3P	K	C	8		Si	TY	3		P	TY	3.08		Te	TY
KSiAsO3	K	HB	8		Si	TY	3		As	TY	3		O	A	2
KSiAsS3	K	ET	7		Si	TY	3		As	TY	3		S	TY	3.33
KSiAsSe3	K	C	8		Si	TY	3		As	TY	3		Se	TY	3.33
KSiTe3As	K	C	8		Si	TY	3		As	TY	3.08		Te	TY
KSiSbO3	K	FO	7		Si	TY	3		Sb	TY	3		O	A	2
KSiSbS3	K	ET	7		Si	TY	3		Sb	TY	3		S	TY	3.33
KSiSbSe3	K	C	8		Si	TY	3		Sb	TY	3		Se	TY	3.33
KSiSbTe3	K	C	8		Si	TY	3		Sb	TY	3		Te	TY	3.33
KSiBiO3	K	O	6		Si	TY	3		Bi	SS	3.5		O	S	1.33
KSiBiS3	K	ET	7		Si	TY	3		Bi	TY	3		S	TY	3
KSiBiSe3	K	ET	7		Si	TY	3		Bi	TY	3		Se	TY	3.33
KSiBiTe3	K	BO_2	8		Si	TY	3		Bi	TY	3		Te	TY	3.33
KGeNO3	K	T	6		Ge	A	2		N	S	1		O	A	1.67
KGeS3N	K	TI	9		Ge	TY	3		N	TY	2		S	S
KGeSe3N	K	BS_2	10		Ge	TY	3		N	TY	2.33		Se	A
KGeTe3N	K	BS_2	10		Ge	PP	5		N	TY	2.67		Te	A
KGePO3	K	DDPN	8		Ge	TY	3		P	TY	3		O	A	2
KGePS3	K	DDPN	8		Ge	TY	3		P	TY	3		S	A	2
KGePSe3	K	BO_2	8		Ge	TY	3		P	TY	3		Se	A	2.33
KGeAsO3	K	SBT	8		Ge	TY	3		As	TY	3		O	A	2
KGeAsS3	K	ET	7		Ge	TY	3		As	TY	3		S	TY	3.33
KGeAsSe3	K	C	8		Ge	TY	3		As	TY	3		Se	TY	3.33
KGeTe3As	K	C	8		Ge	TY	3		As	TY	3.08		Te	TY
KGeSbS3	K	ET	7		Ge	TY	3		Sb	TY	3		S	TY	3.33
KGeSbSe3	K	C	8		Ge	TY	3		Sb	TY	3		Se	TY	3.33
KGeSbTe3	K	C	8		Ge	TY	3		Sb	TY	3		Te	TY	3.33
KGeBiO3	K	ST	7		Ge	TY	3		Bi	S	4		O	TY	3
KSnNO3	K	S	5		Sn	S	2		N	TY	2.5		O	S	1.33
KSnS3N	K	SBT	8		Sn	TY	4		N	TY	1.67		S	S
KSnSe3N	K	TO_1	9		Sn	TY	4		N	TY	2		Se	S
KSnTe3N	K	DI	11		Sn	S	7		N	TY	2.33		Te	S
KSnPSe3	K	BO_2	8		Sn	TY	3		P	TY	3		Se	A	2.33
KSnAsO3	K	ST	7		Sn	S	4		As	TY	3		O	A	2
KSnAsS3	K	BO_2	8		Sn	TY	3		As	TY	3		S	TY	3
KSnAsSe3	K	BO_2	8		Sn	TY	3		As	TY	3		Se	TY	3.33
KSnTe3As	K	BO_2	8		Sn	TY	3		As	TY	3.08		Te	TY
KSnSbO3	K	PB	7		Sn	TY	3		Sb	TY	3		O	A	3
KSnSbS3	K	ET	7		Sn	TY	3		Sb	TY	3		S	TY	3.33
KSnSbSe3	K	BO_2	8		Sn	TY	3		Sb	TY	3		Se	TY	3.33
KSnSbTe3	K	C	8		Sn	TY	3		Sb	TY	3		Te	TY	3.33
KSnBiS3	K	ET	7		Sn	TY	3		Bi	TY	3		S	TY	3.33
KSnBiSe3	K	ET	7		Sn	TY	3		Bi	TY	3		Se	TY	3.33
KSnBiTe3	K	BO_2	8		Sn	TY	3		Bi	TY	3		Te	TY	3.33
KPbNO3	K	S	5		Pb	TY	3		N	TY	2.5		O	S	1.33
KPbSe3N	K	T	6		Pb	T	5		N	TY	1.67		Se	S
KTe3PbN	K	TI	9		Pb	SA	N		TY	4	Te		S
KPPbO3	K	O	6		Pb	PP	6		P	TY	3		O	S	1
KPPbS3	K	BO_2	8		Pb	TY	4		P	TY	3		S	A	2
KPPbSe3	K	T	5		Pb	S	5.5		P	TY	3		Se	A	2.33
KTe3PPb	K	ST	7		Pb	ST	4.08		P	TY	Te		TY
KAsPbO3	K	ST	7		Pb	S	4		As	TY	3		O	A	1.67
KAsPbS3	K	BO_2	8		Pb	TY	3		As	TY	3		S	TY	3
KAsPbSe3	K	BO_2	8		Pb	TY	3		As	TY	3		Se	TY	3.33
KSbPbO3	K	ST	7		Pb	S	4		Sb	TY	3		O	TY	3.33
KSbPbS3	K	ET	7		Pb	TY	3		Sb	TY	3		S	TY	3.33
KSbPbSe3	K	BO_2	8		Pb	TY	3		Sb	TY	3		Se	TY	3.33
KSbTe3Pb	K	T	6		Pb	S	5.33		Sb	S	5		Te	S
KBiPbO3	K	T	5		Pb	S	4		Bi	TY	3		O	SS	4
KBiPbS3	K	T	5		Pb	TY	3		Bi	TY	3		S	TY	3.33
KBiPbSe3	K	T	6		Pb	S	5.5		Bi	S	5		Se	S	5
KBiTe3Pb	K	O	6		Pb	S	5.33		Bi	S	5		Te	S
SiCuNO3	Cu	TS	3		Si	TY	3		N	TY	2.5		O	S	1.83
SiCuS3N	Cu	T	5		Si	TY	3.5		N	TY	3.08		S	TY
SiCuSe3N	Cu	T	5		Si	S	4.5		N	TY	3.08		Se	TY
SiCuTe3N	Cu	T	5		Si	S	4.5		N	TY	3.17		Te	TY
SiCuPS3	Cu	T	4		Si	TY	3		P	TY	3		S	TY	3.33
SiCuTe3P	Cu	T	4		Si	TY	3		P	TY	3.08		Te	TY
SiCuAsS3	Cu	T	4		Si	TY	3		As	TY	3		S	TY	3.33
SiCuAsSe3	Cu	T	4		Si	TY	3		As	TY	3		Se	TY	3.33
SiCuTe3As	Cu	T	4		Si	TY	3		As	TY	3.08		Te	TY
SiCuSbO3	Cu	S	5		Si	TY	3		Sb	TY	3		O	TY	3.33
SiCuSbS3	Cu	T	4		Si	TY	3		Sb	S	4.5		S	TY	3.33
SiCuSbSe3	Cu	T	4		Si	TY	3		Sb	ST	5.5		Se	TY	3.33
SiCuBiO3	Cu	L	2		Si	TY	3		Bi	SS	4		O	A	2
SiCuBiS3	Cu	T	4		Si	TY	3		Bi	SS	7.5		S	TY	3.33
SiCuBiSe3	Cu	T	4		Si	TY	3		Bi	SS	7.5		Se	TY	3.5
CuGeNO3	Cu	SS	4		Ge	TY	2		N	A	2		O	S	1.67
CuGeS3N	Cu	S	5		Ge	S	5.5		N	TY	3.08		S	TY
CuGeSe3N	Cu	T	5		Ge	ST	6.5		N	TY	3.08		Se	TY
CuGePO3	Cu	T	5		Ge	TY	3		P	TY	3		O	TY	3.33
CuGePS3	Cu	T	4		Ge	S	4.5		P	TY	3		S	TY	3.33
CuGeTe3P	Cu	T	4		Ge	ST	5.5		P	TY	3.08		Te	TY
CuGeAsS3	Cu	T	4		Ge	S	4.5		As	TY	3		S	TY	3.33
CuGeAsSe3	Cu	T	4		Ge	ST	5.5		As	TY	3		Se	TY	3.33
CuGeTe3As	Cu	T	4		Ge	ST	5.5		As	TY	3.08		Te	TY
CuGeSbS3	Cu	T	4		Ge	TY	3		Sb	S	4		S	TY	3.33
CuGeSbSe3	Cu	T	4		Ge	ST	5.5		Sb	S	4.5		Se	TY	3.33
CuGeSbTe3	Cu	T	4		Ge	ST	5.5		Sb	ST	5.5		Te	TY	3.33
CuGeBiO3	Cu	T	4		Ge	TY	3		Bi	S	4		O	TY	3.33
CuGeBiS3	Cu	T	4		Ge	TY	3		Bi	SS	7.5		S	TY	3.33
CuGeBiSe3	Cu	T	4		Ge	PP	4.5		Bi	SS	7.5		Se	TY	3.33
CuGeBiTe3	Cu	O	6		Ge	ST	5.5		Bi	SS	7.5		Te	TY	3.67
CuSnNO3	Cu	L	2		Sn	TY	4		N	A	2		O	S	1.67
CuSnS3N	Cu	T	4		Sn	TT_2	8.5		N	TY	2.42		S	A
CuSnSe3N	Cu	T	5		Sn	TT_2	8.5		N	TY	2.42		Se	A
CuSnTe3N	Cu	T	5		Sn	SS	8.5		N	TY	2.42		Te	A
CuSnPO3	Cu	T	4		Sn	ST	5.5		P	TY	3		O	A	2.33
CuSnTe3P	Cu	T	5		Sn	SS	8.5		P	TY	3.42		Te	TY
CuSnAsSe3	Cu	T	5		Sn	SS	8.5		As	TY	3		Se	TY	3.83
CuSnTe3As	Cu	T	5		Sn	SS	8.5		As	TY	3.42		Te	TY
CuSnSbO3	Cu	T	4		Sn	S	4		Sb	TY	3		O	TY	3.33
CuSnSbS3	Cu	T	4		Sn	SS	7.5		Sb	S	4.5		S	TY	3.83
CuSnSbSe3	Cu	T	5		Sn	SS	7.5		Sb	S	4.5		Se	TY	3.83
CuSnSbTe3	Cu	T	5		Sn	SS	8.5		Sb	ST	5.5		Te	TY	3.83
CuSnBiO3	Cu	T	4		Sn	S	4		Bi	TY	3		O	TY	3.33
CuSnBiS3	Cu	T	4		Sn	SS	7.5		Bi	S	5.5		S	TY	3.5
CuSnBiSe3	Cu	T	5		Sn	SS	7.5		Bi	SS	7.5		Se	TY	3.83
CuSnBiTe3	Cu	T	5		Sn	SS	8.5		Bi	SS	7.5		Te	TY	4.17
CuPbS3N	Cu	T	4		Pb	TT_2	8.5		N	TY	2.42		S	A
CuPbSe3N	Cu	T	5		Pb	TT_2	8.5		N	TY	2.42		Se	A
CuPPbO3	Cu	T	4		Pb	ST	7		P	TY	3		O	A	2
CuPPbSe3	Cu	T	5		Pb	SS	8.5		P	TY	3		Se	TY	3.5
CuTe3PPb	Cu	T	5		Pb	SS	5		P	TY	Te		TY
CuAsPbO3	Cu	T	4		Pb	TO_1	8.5		As	TY	3		O	TY	3
CuAsPbS3	Cu	T	4		Pb	SS	8.5		As	TY	3		S	TY	3.83
CuAsPbSe3	Cu	T	5		Pb	SS	8.5		As	TY	3		Se	TY	3.83
CuTe3AsPb	Cu	T	5		Pb	SS	5.08		As	TY	Te		TY
CuSbPbO3	Cu	T	4		Pb	TT_2	6.5		Sb	TY	3		O	TY	3.67
CuSbPbS3	Cu	T	4		Pb	SS	8.5		Sb	TY	3		S	SS	3.83
CuSbPbSe3	Cu	T	5		Pb	SS	8.5		Sb	TY	3.5		Se	TY	3.83
CuSbTe3Pb	Cu	T	5		Pb	SS	5.25		Sb	ST	5.5		Te	TY
CuBiPbO3	Cu	T	4		Pb	SS	6.5		Bi	TY	3		O	TY	3.67
CuBiPbS3	Cu	T	4		Pb	BS_2	10		Bi	ST	7		S	O	5.67
CuBiPbSe3	Cu	T	5		Pb	SS	8.5		Bi	ST	6.5		Se	TY	3.83
CuBiTe3Pb	Cu	T	5		Pb	SS	5.25		Bi	SS	7.5		Te	TY
SiAgNO3	Ag	SMA	9		Si	A	2.5		N	A	1.5		O	A	1.33
SiAgS3N	Ag	PP	6		Si	TY	3		N	TY	2.92		S	TY
SiAgTe3N	Ag	T	6		Si	FO	5.5		N	TY	3.08		Te	TY
SiAgPO3	Ag	HB	8		Si	TY	3		P	TY	3		O	A	2
SiAgPS3	Ag	PP	6		Si	TY	3		P	TY	3		S	TY	3.33
SiAgPSe3	Ag	T	5		Si	TY	3		P	TY	3		Se	TY	3.33
SiAgTe3P	Ag	T	5		Si	TY	3		P	TY	3.08		Te	TY
SiAgAsS3	Ag	T	5		Si	TY	3		As	TY	3		S	TY	3.33
SiAgAsSe3	Ag	T	5		Si	TY	3		As	TY	3		Se	TY	3.33
SiAgSbS3	Ag	T	5		Si	TY	3		Sb	TY	3		S	TY	3.33
SiAgSbSe3	Ag	T	4		Si	TY	3		Sb	TY	3		Se	TY	3.33
SiAgSbTe3	Ag	T	5		Si	TY	3		Sb	PP	4		Te	TY	3.33
SiAgBiO3	Ag	T	5		Si	TY	3		Bi	TY	3.5		O	A	1.83
SiAgBiS3	Ag	T	4		Si	TY	3		Bi	TY	3		S	TY	3.33
SiAgBiSe3	Ag	T	4		Si	TY	3		Bi	ST	5		Se	TY	3.67
SiAgBiTe3	Ag	O	6		Si	PP	4		Bi	ST	5.5		Te	TY	3.67
AgGeNO3	Ag	T	5		Ge	S	1		N	A	2		O	S	1.67
AgGeS3N	Ag	PP	6		Ge	TY	3		N	TY	2.92		S	TY
AgGeSe3N	Ag	T	5		Ge	PP	4		N	TY	3.08		Se	TY
AgGeTe3N	Ag	T	5		Ge	ST	5.5		N	TY	3.08		Te	TY
AgGePO3	Ag	ET	7		Ge	TY	3		P	TY	3		O	A	2
AgGePS3	Ag	T	5		Ge	TY	3		P	TY	3		S	TY	3.33
AgGePSe3	Ag	T	5		Ge	PP	4		P	TY	3		Se	TY	3.33
AgGeTe3P	Ag	T	5		Ge	PP	4		P	TY	3.08		Te	TY
AgGeAsO3	Ag	PP	6		Ge	TY	3		As	TY	3		O	TY	3.33
AgGeAsS3	Ag	T	5		Ge	TY	3		As	TY	3		S	TY	3.33
AgGeAsSe3	Ag	PP	6		Ge	PP	4		As	TY	3		Se	TY	3.33
AgGeTe3As	Ag	T	5		Ge	PP	4		As	TY	3.08		Te	TY
AgGeSbO3	Ag	PP	6		Ge	TY	3		Sb	TY	3		O	TY	3.33
AgGeSbS3	Ag	T	4		Ge	TY	3		Sb	TY	3		S	TY	3.33
AgGeSbSe3	Ag	T	5		Ge	PP	4		Sb	TY	3		Se	TY	3.33
AgGeSbTe3	Ag	T	5		Ge	PP	4		Sb	PP	4		Te	TY	3.33
AgGeBiO3	Ag	T	5		Ge	TY	3		Bi	S	4		O	TY	3.33
AgGeBiS3	Ag	T	4		Ge	TY	3		Bi	TY	3		S	TY	3.33
AgGeBiSe3	Ag	T	5		Ge	PP	4		Bi	PP	4		Se	TY	3.33
AgGeBiTe3	Ag	O	6		Ge	PP	4		Bi	ST	5.5		Te	TY	3.33
AgSnNO3	Ag	SS	4		Sn	S	4		N	A	2		O	S	1.67
AgSnS3N	Ag	S	5		Sn	ST	7.5		N	TY	2		S	A
AgSnSe3N	Ag	T	6		Sn	ST	7.5		N	TY	2.42		Se	A
AgSnTe3N	Ag	T	5		Sn	SS	8.5		N	TY	2.42		Te	A
AgSnPS3	Ag	T	5		Sn	ST	6.5		P	TY	3		S	TY	3.33
AgSnPSe3	Ag	T	6		Sn	ST	6.5		P	TY	3		Se	TY	3.33
AgSnTe3P	Ag	T	5		Sn	SS	7.5		P	TY	3.08		Te	TY
AgSnAsO3	Ag	O	6		Sn	TY	3		As	TY	3		O	TY	3.33
AgSnAsS3	Ag	T	5		Sn	ST	6.5		As	TY	3		S	TY	3.33
AgSnAsSe3	Ag	T	5		Sn	ST	5.5		As	TY	3		Se	TY	3.33
AgSnTe3As	Ag	T	5		Sn	ST	5.5		As	TY	3.17		Te	TY
AgSnSbO3	Ag	T	5		Sn	TY	3		Sb	TY	3		O	TY	3.33
AgSnSbS3	Ag	T	4		Sn	ST	5.5		Sb	TY	3		S	TY	3.33
AgSnSbSe3	Ag	T	5		Sn	ST	5.5		Sb	TY	3		Se	TY	3.33
AgSnSbTe3	Ag	T	5		Sn	ST	5.5		Sb	PP	4		Te	TY	3.83
AgSnBiO3	Ag	T	5		Sn	S	4		Bi	S	4		O	TY	4
AgSnBiS3	Ag	T	5		Sn	ST	5.5		Bi	TY	3		S	TY	3.33
AgSnBiSe3	Ag	O	6		Sn	ST	5.5		Bi	PP	4		Se	TY	3.83
AgPbNO3	Ag	L	2		Pb	S	4		N	A	2		O	S	1.83
AgPbS3N	Ag	T	5		Pb	TT_2	9.5		N	TY	2		S	A
AgPbSe3N	Ag	T	5		Pb	SS	8.5		N	TY	2.42		Se	A
AgTe3PbN	Ag	T	5		Pb	SS	N		TY	4.58	Te		A
AgPPbO3	Ag	T	4		Pb	PP	6		P	TY	3		O	A	1.33
AgPPbS3	Ag	T	6		Pb	SS	8.5		P	TY	3		S	TY	3.33
AgPPbSe3	Ag	T	5		Pb	SS	8.5		P	TY	3		Se	TY	3.33
AgTe3PPb	Ag	T	5		Pb	SS	4.92		P	TY	Te		TY
AgAsPbO3	Ag	T	5		Pb	S	5		As	TY	3		O	A	2.67
AgAsPbS3	Ag	T	5		Pb	SS	8.5		As	TY	3		S	TY	3.33
AgAsPbSe3	Ag	T	5		Pb	SS	8.5		As	TY	3		Se	TY	3.33
AgTe3AsPb	Ag	T	5		Pb	SS	5		As	TY	Te		TY
AgSbPbSe3	Ag	T	5		Pb	SS	7.5		Sb	TY	3		Se	TY	3.83
AgSbTe3Pb	Ag	O	6		Pb	SS	5.25		Sb	PP	4		Te	TY
AgBiPbO3	Ag	T	5		Pb	S	5		Bi	S	4		O	TY	4
AgBiPbS3	Ag	T	5		Pb	SS	7.5		Bi	PP	4		S	TY	3.83
AgBiPbSe3	Ag	O	6		Pb	SS	8.5		Bi	PP	4		Se	TY	3.83
AgBiTe3Pb	Ag	O	6		Pb	SS	5.5		Bi	ST	5.5		Te	TY
NaSiPO3	Na	HB	8		Si	TY	3		P	TY	3		O	A	2
NaSnSbTe3	Na	T	6		Sn	FO	6.5		Sb	S	5		Te	S	5.17
NaTe3PbN	Na	ET	7		Pb	SA	9		N	TY	3		Te	S	1.33
NaSbPbSe3	Na	T	5		Pb	PP	6		Sb	S	4		Se	T	4.83
KGeTe3P	K	DI	11		Ge	S	4		P	TY	2.5		Te	A
KGeSbO3	K	PB	7		Ge	TY	3		Sb	TY	3		O	TY	3
KGeBiS3	K	PB	7		Ge	TY	3		Bi	TY	3		S	TY	3.33
KGeBiSe3	K	PP	6		Ge	TY	3		Bi	TY	4		Se	TY	3.67
KGeBiTe3	K	PB	7		Ge	S	5		Bi	S	5		Te	S	5
KSnPO3	K	TT_2	9		Sn	SS	3.5		P	TY	3		O	S	1.33
KSnPS3	K	HB	8		Sn	S	5		P	TY	3		S	A	2
KSnTe3P	K	TT_1	9		Sn	O	6.5		P	TY	3.08		Te	TY
KSnBiO3	K	PB	7		Sn	TY	3		Bi	TY	3		O	T	3.67
KPbS3N	K	S	5		Pb	TY	3.5		N	TY	1.67		S	S
KTe3AsPb	K	T	6		Pb	S	4.17		As	TY	Te		SS
SiCuPO3	Cu	PP	6		Si	TY	3		P	TY	3		O	TL	2.67
SiCuPSe3	Cu	T	4		Si	TY	3		P	TY	3		Se	TY	3.33
SiCuAsO3	Cu	T	6		Si	TY	3		As	TY	3		O	A	2.67
SiCuSbTe3	Cu	T	4		Si	TY	3		Sb	S	4.5		Te	TY	3.33
SiCuBiTe3	Cu	T	4		Si	TY	3		Bi	SS	7.5		Te	TY	3.5
CuGeTe3N	Cu	T	6		Ge	SS	6.5		N	TY	3.17		Te	TY
CuGePSe3	Cu	T	4		Ge	S	4.5		P	TY	3		Se	TY	3.33
CuGeAsO3	Cu	S	5		Ge	TY	3		As	TY	3		O	TY	3.33
CuGeSbO3	Cu	S	5		Ge	TY	3		Sb	TY	3		O	TY	3.33
CuSnPS3	Cu	T	4		Sn	ST	6.5		P	TY	3		S	TY	3.33
CuSnPSe3	Cu	T	4		Sn	SS	8.5		P	TY	3		Se	TY	3.5
CuSnAsO3	Cu	T	5		Sn	S	4		As	TY	3		O	TY	3.33
CuSnAsS3	Cu	T	4		Sn	ST	6.5		As	TY	3		S	TY	3.5
CuPbNO3	Cu	L	2		Pb	ST	5.5		N	A	2		O	S	1.67
CuTe3PbN	Cu	T	5		Pb	SS	N		TY	4.58	Te		A
CuPPbS3	Cu	T	4		Pb	TT_2	8.5		P	TY	3		S	TY	3.5
SiAgSe3N	Ag	PP	6		Si	TY	3		N	TY	3.08		Se	TY
SiAgAsO3	Ag	BS_1	10		Si	TY	3		As	TY	3		O	A	2
SiAgTe3As	Ag	T	5		Si	TY	3		As	TY	3.08		Te	TY
SiAgSbO3	Ag	BS_1	10		Si	TY	3		Sb	TY	3		O	A	2
AgSnPO3	Ag	PP	6		Sn	S	5		P	TY	3		O	S	1.33
AgSnBiTe3	Ag	T	5		Sn	ST	6.5		Bi	ST	5.5		Te	TY	4.33
AgSbPbO3	Ag	T	4		Pb	S	5		Sb	TY	3		O	TY	3.67
AgSbPbS3	Ag	O	6		Pb	PB	7		Sb	SS	4		S	O	5

## Sheet: DFT gap=0 eV
NaSiTe3N
NaSiBiO3
NaGeSe3N
NaGeTe3N
NaSnTe3N
NaTe3PbN
KSiS3N
KSiTe3N
KGeSe3N
KGeTe3N
KGeTe3P
KSnTe3N
KTe3PbN
SiCuS3N
SiCuSe3N
SiCuTe3N
SiCuTe3P
SiCuTe3As
SiCuSbTe3
SiCuBiSe3
SiCuBiTe3
CuGeSe3N
CuGeTe3N
CuGeTe3P
CuGeTe3As
CuGeSbSe3
CuGeSbTe3
CuGeBiSe3
CuGeBiTe3
CuSnSbTe3
CuSnBiSe3
CuSnBiTe3
CuBiTe3Pb
SiAgS3N
SiAgSe3N
SiAgTe3N
SiAgTe3P
SiAgTe3As
SiAgSbTe3
SiAgBiTe3
AgGeSe3N
AgGeTe3N
AgGeTe3P
AgGeTe3As
AgGeSbTe3
AgGeBiO3
AgGeBiTe3
AgSnSe3N
AgSnTe3N
